1 **Rapid protection from COVID-19 in nonhuman primates vaccinated intramuscularly but not**  
2 **intranasally with a single dose of a recombinant vaccine**

3

4 One sentence summary

5 VSV vaccine protects NHPs from COVID-19 in 10 days

6

7 Wakako Furuyama<sup>1</sup>, Kyle Shifflett<sup>1</sup>, Amanda N. Pinski<sup>2</sup>, Amanda J. Griffin<sup>1</sup>, Friederike Feldmann<sup>3</sup>, Atsushi

8 Okumura<sup>1</sup>, Tylisha Gourdine<sup>1</sup>, Allen Jankeel<sup>2</sup>, Jamie Lovaglio<sup>3</sup>, Patrick W. Hanley<sup>3</sup>, Tina Thomas<sup>1</sup>, Chad S.

9 Clancy<sup>3</sup>, Ilhem Messaoudi<sup>2</sup>, Kyle L. O'Donnell<sup>1</sup>, and Andrea Marzi<sup>1\*</sup>

10

11 <sup>1</sup>Laboratory of Virology, and <sup>3</sup>Rocky Mountain Veterinary Branch, Division of Intramural Research,

12 National Institute of Allergy and Infectious Diseases, National Institutes of Health, Hamilton, MT 59840,

13 USA

14 <sup>2</sup>Department of Molecular Biology and Biochemistry, University of California - Irvine, Irvine, CA 92697,

15 USA

16

17

18

19 \*Corresponding author

20 Andrea Marzi

21 [marzia@niaid.nih.gov](mailto:marzia@niaid.nih.gov)

22

23

24 **Abstract**

25           The ongoing pandemic of Coronavirus disease 2019 (COVID-19) continues to exert a significant  
26 burden on health care systems worldwide. With limited treatments available, vaccination remains an  
27 effective strategy to counter transmission of severe acute respiratory syndrome coronavirus 2 (SARS-  
28 CoV-2). Recent discussions concerning vaccination strategies have focused on identifying vaccine  
29 platforms, number of doses, route of administration, and time to reach peak immunity against SARS-  
30 CoV-2. Here, we generated a single dose, fast-acting vesicular stomatitis virus-based vaccine derived  
31 from the licensed Ebola virus (EBOV) vaccine rVSV-ZEBOV, expressing the SARS-CoV-2 spike protein and  
32 the EBOV glycoprotein (VSV-SARS2-EBOV). Rhesus macaques vaccinated intramuscularly (IM) with a  
33 single dose of VSV-SARS2-EBOV were protected within 10 days and did not show signs of COVID-19  
34 pneumonia. In contrast, intranasal (IN) vaccination resulted in limited immunogenicity and enhanced  
35 COVID-19 pneumonia compared to control animals. While IM and IN vaccination both induced  
36 neutralizing antibody titers, only IM vaccination resulted in a significant cellular immune response. RNA  
37 sequencing data bolstered these results by revealing robust activation of the innate and adaptive  
38 immune transcriptional signatures in the lungs of IM-vaccinated animals only. Overall, the data  
39 demonstrates that VSV-SARS2-EBOV is a potent single-dose COVID-19 vaccine candidate that offers  
40 rapid protection based on the protective efficacy observed in our study.

41

## 42 Introduction

43 Severe acute respiratory syndrome coronavirus 2 (SARS-CoV-2) is a positive-sense, single-  
44 stranded RNA virus first isolated from a patient with severe respiratory illness in Wuhan, China (1).  
45 SARS-CoV-2 infection manifests as a clinical syndrome termed Coronavirus disease 2019 (COVID-19),  
46 which can lead to respiratory failure (2). In addition to respiratory distress, other clinical manifestations  
47 associated with SARS-CoV-2 infection include cardiac pathology, gastrointestinal disease, coagulopathy,  
48 and hyperinflammatory syndrome (3-5). Patients with an increased risk of severe clinical manifestation  
49 include the elderly, immunocompromised, and individuals with co-morbidities (obesity, diabetes,  
50 hypertension etc.)(6). Virtually every country has been affected with almost one hundred million  
51 infections to date and an estimated case fatality rate of ~2% (<https://coronavirus.jhu.edu/map.html>).  
52 The widespread morbidity, mortality, and socioeconomic impact of COVID-19 emphasize the urgent  
53 need for the development and deployment of countermeasures, including vaccines.

54 The COVID-19 pandemic has made the development of a vaccine a global priority (7-9). An ideal  
55 vaccine candidate is safe, effective, fast-acting, rapidly deployable, and requires only a single  
56 immunization. Most of the current vaccine candidates encode the trimeric SARS-CoV-2 spike (S) protein  
57 as the primary antigen. S is essential for SARS-CoV-2 infectivity since it binds the angiotensin-converting  
58 enzyme 2 (ACE2) receptor and promotes viral-cell membrane fusion (10). It is also the main target for  
59 virus neutralization (11). The route of vaccination can greatly influence the local immune environment at  
60 the vaccination and infection site. Recently, the comparison of intramuscular (IM) and intranasal (IN)  
61 vaccination of mice with a chimpanzee adenoviral vector-based vaccine revealed an increase in  
62 stimulation of local mucosal immunity and generation of antigen-specific IgA and lung resident T cells  
63 after IN vaccination. The local mucosal immunity was improved by the generation of antigen-specific IgA  
64 and lung resident T cell generation after IN vaccination (12). Prior to progression to human clinical trials,  
65 several COVID-19 vaccine candidates were IM administered to nonhuman primates (NHPs) to evaluate  
66 their efficacy (13-16).

67 The recombinant vesicular stomatitis virus (VSV) vaccine platform has previously been utilized in  
68 vaccines against multiple viral pathogens, such as Ebola virus (EBOV), Marburg, Nipah, and Lassa viruses  
69 (17-19). VSV-based vaccines elicit a robust and rapid immune response to the encoded antigen(s) after a  
70 single immunization (20). The time to immunity has been demonstrated to be within 7-10 days for a  
71 number of pathogens in preclinical and clinical studies, greatly reducing the time needed between  
72 vaccination and protection (21-24). Multiple routes of VSV-based vaccination, such as IM and IN, have

73 been shown to be efficacious (21, 22, 25). Furthermore, the general population is predominantly  
74 seronegative for VSV, circumventing pre-existing immunity neutralizing the vaccine virus (20). These  
75 unique attributes - robust immune stimulation and time to immunity - make this an attractive vaccine  
76 platform for SARS-CoV-2. However, the immunogenicity and efficacy of an IM- or IN-administered  
77 COVID-19 VSV-based vaccine has not been tested in the NHP model.

78 In the present study, we developed a VSV-based vector expressing the SARS-CoV-2 S in  
79 combination with the EBOV glycoprotein (GP). We utilized the NHP challenge model and compared the  
80 vaccine efficacy with a shorter time to challenge in tandem with comparing the optimal route of  
81 immunization. We demonstrate that IM-vaccinated NHPs developed no to mild lesions of COVID-19 with  
82 variable immunopathology, whereas IN vaccination resulted immune-enhanced disease with interstitial  
83 pneumonia in NHPs. IM vaccination resulted in robust and rapid humoral and cellular immune responses  
84 while with IN vaccination did not. Transcriptional analysis of the lungs supports our immunological  
85 findings by revealing greater expression of innate and adaptive immune genes in the IM vaccination  
86 group.

87

## 88 **Results**

### 89 *Vaccine construction and characterization*

90 The VSV-backbone encoding the EBOV Kikwit GP, rVSV-ZEBOV, was used as a parental vector to  
91 construct this COVID-19 vaccine. Therefore, we generated a VSV construct co-expressing the EBOV GP  
92 and SARS-CoV-2 S (VSV-SARS2-EBOV) by the adding the full-length codon-optimized SARS-CoV-2 S  
93 upstream of the EBOV GP into the existing VSV vector (Fig. S1A). The construct was recovered from  
94 plasmid following previously established protocols (26). Expression of both antigens, SARS-CoV-2 S and  
95 EBOV GP, was confirmed by Western blot analysis of the VSV particles in cell supernatant (Fig. S1B).  
96 Next, we performed viral growth kinetics. VSV-SARS2-EBOV replicated with similar kinetics and had  
97 comparable endpoint titers to the parental VSV-EBOV in Vero E6 cells (Fig. S1C), which does not impact  
98 potential vaccine production.

99

### 100 *Efficacy in nonhuman primates (NHPs)*

101 We demonstrated previously that the parental VSV-EBOV is a fast-acting, IM-administered  
102 vaccine (21); that was confirmed in human phase 3 clinical trials (24). Therefore, we set out to analyze  
103 the fast-acting potential of a single dose of this VSV-based COVID-19 vaccine in rhesus macaques. Unlike

104 EBOV disease (EVD), COVID-19 is a respiratory disease. However, a previously published study  
105 demonstrated that mucosal immunization with VSV-EBOV protected the NHPs from EVD (25). To  
106 determine the efficacy of mucosal vaccination against COVID-19 in NHPs, we compared the efficacy of  
107 IM and IN vaccination in the rhesus macaque model (27). Groups of 6 NHPs were either IN- or IM-  
108 vaccinated with VSV-SARS2-EBOV while control animals received a single dose of VSV-EBOV IN (n=2) or  
109 IM (n=2)(Fig. S1D). All NHPs were observed for potential adverse effects, particularly after IN vaccination  
110 as this is not the standard route of administration for this vaccine platform, but no clinical changes were  
111 noted. After 10 days, all NHPs were challenged with SARS-CoV-2 as previously described (27). On days  
112 post challenge (dpc) 0, 1, 3, 5, and 7, a clinical exam including thoracic radiographs and nasal swab  
113 collection was performed; in addition, the dpc 3 exam included a bronchoalveolar lavage (BAL). On dpc  
114 7, all NHPs were euthanized and samples were collected for analysis. None of the vaccinated animals  
115 displayed clinical signs of disease after challenge.

116 We determined differences in total SARS-CoV-2 RNA and subgenomic (sg) RNA in the nasal  
117 swabs of the animals throughout the study. Interestingly, IN vaccination resulted in significantly lower  
118 levels of nasal viral RNA on dpc 1 compared to IM indicating better local control of virus replication (Fig.  
119 1A). However, on dpc 3 only the total SARS-CoV-2-specific RNA levels were significantly different (Fig.  
120 1A). In contrast, both total and sg RNA levels in the BAL were significantly lower for the IM vaccination  
121 group compared to IN-vaccinated and control groups (Fig. 1B). This finding is supported by our  
122 observation that the IN-vaccinated NHPs had more lung infiltrates compared to the IM and control  
123 groups at the time of euthanasia (Fig. 1C). Additionally, only IN-vaccinated NHPs exhibited lung lesions  
124 (Fig. S2). This was accompanied by a significant reduction of total RNA and sgRNA in IM-vaccinated, but  
125 not IN-vaccinated NHPs compared to controls (Fig. 1D). The comparison of RNA levels in individual lung  
126 lobes and other examined tissue samples did not reveal any significant differences (Fig. S3).

127

#### 128 *Histopathology in NHPs*

129 Histopathologic analysis of the collected lung samples revealed pulmonary pathology consistent  
130 with the previously described rhesus macaque model of SARS-CoV-2 infection in the control group  
131 regardless of IM or IN administration of the control vaccine (Fig. 2A,D)(27). In the IM vaccination group  
132 pulmonary lesions consisted of low to moderate numbers of eosinophils multifocally infiltrating  
133 bronchiolar mucosa, excess mucus accumulation in the lumen of bronchi and bronchioles, and profound  
134 perivascular lymphocytic cuffing (interpreted as immune pathology) disseminated throughout all lung  
135 lobes (Fig. 2B,E). In combination, these lesions are suggestive of a localized hypersensitivity response.

136 Hypersensitivity lesion location mirrored that of what has previously been described in this NHP model  
137 of COVID-19 (27), with a high proportion of lesions located at the periphery of the lung and increased  
138 lesion severity in lower lung lobes. Limited evidence of type I pneumocyte damage was present in rare  
139 foci and was characterized by lining of alveoli by type II pneumocytes and a scant amount of  
140 proteinaceous fluid within alveolar spaces (Fig. 2B,E). Histopathologic lesions in the IN vaccination group  
141 mirrored the enhanced gross lesion severity and histologically consisted of an immune-enhanced  
142 disease with evidence of classic moderate to severe SARS-CoV-2 pulmonary pathology and moderate  
143 hypersensitivity response (Fig. 2C,F). The hypersensitivity response was similar to that observed in the  
144 IM-vaccinated group, but more severe with the addition of eosinophil spillover into bronchiolar lumen  
145 and moderate numbers of alveolar spaces. SARS-CoV-2 nucleoprotein immunoreactivity was observed in  
146 type I pneumocytes and macrophages of both the control and IN groups, but not in the IM vaccination  
147 group (Fig. 2G-I).

148

#### 149 *Immune responses in NHPs*

150 We next analyzed the peripheral humoral response. IgG responses to the full-length SARS-CoV-2  
151 S, the S receptor binding domain (RBD), and the EBOV GP were determined following vaccination and  
152 challenge (Fig. 3). We demonstrated that the IM-vaccinated NHPs attained significantly higher SARS-  
153 CoV-2 S-specific IgG starting 10 days after vaccination and following challenge compared to IN-  
154 vaccinated NHPs and controls (Fig. 3A). Similarly, the IgG response to the SARS-CoV-2 S RBD was higher  
155 at day 10 post vaccination (0 dpc) in the IM group compared to the IN and controls (Fig. 3B). Analysis of  
156 the IgG subclasses in serum on dpc 0 and 7 showed that both vaccination routes resulted in  
157 predominantly IgG1, IgG2 and IgG3 antibodies with no significant difference between the groups (Fig.  
158 3C). Only IgG1 increased after challenge in both vaccine groups significantly compared to controls (Fig.  
159 3C). Interestingly, on dpc 7 both IgG2 and IgG3 antibodies were largely absent in sera from IN-  
160 vaccinated NHPs (Fig. 3C). IgG responses specific to EBOV GP support the finding that IM vaccination  
161 appears more immunogenic compared to IN even though the data are only significantly different on day  
162 0 and day 3 (Fig. S4A). Measurable SARS-CoV-2 neutralizing titers were detected as early as 10 days  
163 following vaccination for the IM group, and 11 days for the IN group (Fig. 3D). On day 3, significantly  
164 higher titers were observed comparing IM-vaccinated NHPs to controls only (Fig. 3D). At the time of  
165 euthanasia, the neutralizing titers in IM- and IN-vaccinated NHPs were comparable but significantly  
166 higher than those observed in control animals (Fig. 3D)

167           Next, we investigated the humoral responses in the BAL obtained on dpc 3. We detected SARS-  
168 CoV-2 S-specific IgG in 3 of the 6 NHPs in the IM vaccinated group but only in 1 of 6 NHPs in the IN group  
169 (Fig. 3E). Only the IM-vaccinated NHP with the highest titer of SARS-CoV-2 S-specific IgG had anti-SARS-  
170 CoV-2 S RBD IgG (Fig. 3E). SARS-CoV-2 S-specific IgA was not detected in any of the BAL samples (Fig. 3E).  
171 In contrast to serum, no IgG1 was detected; however, IgG2 and IgG3 were readily detected in several  
172 IM-vaccinated NHPs (Fig. 3F). Unexpectedly, IM vaccination resulted in higher humoral responses in the  
173 lung to all antigens including EBOV GP (Fig. S4B).

174           We analyzed the peripheral cellular response even though T cell responses have shown to play  
175 only a limited role mediating protection using the VSV-EBOV vaccine (28, 29). Peripheral blood  
176 mononuclear cells (PBMCs) were stimulated with a peptide-pool spanning the entire length of the SARS-  
177 CoV-2 S and the antigen-specific T cells were identified using intracellular cytokine staining (Fig.4A,B).  
178 While there was minimal cytokine production by CD4<sup>+</sup> T cells, a significant increase in the CD69  
179 activation marker was seen in IM-vaccinated NHPs on 0 and 7 dpc relative to controls (Fig. 4A). Similarly,  
180 a significantly higher portion of the CD8<sup>+</sup> T cells from the IM group produced granzyme B on dpc 0 and 7  
181 compared to controls and IN groups (Fig. 4B). Interestingly, numbers of IL-2<sup>+</sup> CD4<sup>+</sup> and CD8<sup>+</sup> T cells were  
182 significantly lower in the IM group on dpc 0, and comparable to IN and control groups by dpc 7 (Fig.  
183 4A,B). Additionally, a greater number of granzyme B<sup>+</sup> NK cells was measured on dpc 0 and 7 in IM-  
184 vaccinated animals compared to IN-vaccinated and control animals (Fig. 4C).

185           Finally, we monitored levels of systemic and BAL cytokines and chemokines. We found a  
186 significant increase in MCP-1 on dpc 1 and 3 in IN-vaccinated animals compared to IM-vaccinated  
187 animals. A similar trend was observed for IL-18 on dpc 3 and 5 (Fig. S5A). Levels of MIP-1 $\beta$  were  
188 significantly lower at all dpcs in IM-vaccinated animals compared to the control and IN-vaccinated  
189 animals (Fig. S5A). Analysis of cytokine and chemokine levels in the BAL revealed that MCP-1 levels were  
190 significantly decreased in IN-vaccinated NHPs (Fig. S5B). All other investigated cytokines did not show  
191 significant differences.

192

### 193 *Transcriptional analysis of BAL samples*

194           To better understand the molecular underpinnings of differential vaccine responses, we profiled  
195 the host transcriptional response in the BAL (dpc 3) samples. Principal component analysis (PCA) of BAL  
196 samples indicated a distinct separation of uninfected/naïve (historical data) and the three challenged  
197 groups, with no clear distinction between the challenged groups (Fig. S6A). Therefore, the samples from  
198 control, IM- or IN-vaccinated animals were compared to the uninfected samples. Over 1,000

199 differentially expressed genes (DEGs) were detected in the challenged groups compared to the  
200 uninfected animals, with most DEGs being upregulated (Fig. S6B). The majority of DEGs were shared  
201 amongst the three challenged groups (Fig. 5A). Functional enrichment showed that upregulated and  
202 downregulated DEGs shared by all three challenged groups play a role in regulating cell structure (e.g.,  
203 “actin cytoskeleton organization”) and innate immunity (e.g., “positive regulation of cytokine  
204 production”, “myeloid leukocyte activation”) (Fig. 5B). However, only upregulated DEGs enriched to  
205 gene ontology (GO) terms associated with adaptive immunity (e.g., “lymphocyte activation”, “T cell  
206 differentiation”)(Fig. 5B).

207 Further analysis of shared DEGs showed that genes involved in pro-inflammatory pathways (e.g.,  
208 *RELB*, *MFHAS1*, *IL12RB1*, *TNFSF4*, *TRAF2*, *C5AR1*, and *TOLLIP*) were more highly expressed in the control  
209 group compared to IM and IN groups (Fig. S6C, D). A second cluster of inflammation-related genes were  
210 induced to a greater extent in the IN group (*IFT88*, *IL12B*, *CLEC9*, and *IL27RA*), which is in line with the  
211 greater inflammatory response observed in these animals. On the other hand, DEGs implicated in T and  
212 B cell-mediated immunity (e.g., *LCP1*, *PRKCB*) were induced to a greater extent in IM-vaccinated NHPs  
213 (Fig. 5C). Genes enriching to GO term “myeloid cell activation/neutrophil downregulation” were  
214 suppressed to a greater extent in the IM cohort, consistent with the lower inflammation profile  
215 observed in this group (Fig. S6E).

216 We next analyzed vaccine-specific transcriptional responses in the BAL samples of the IN and IM  
217 groups to elucidate unique molecular responses (Fig. 5D-G). DEGs unique to the IN group enriched to GO  
218 terms related to organelle dynamics, such as “organelle localization” as well as antiviral immunity  
219 (“human papillomavirus infection”) (Fig. 5D). Genes important for vesicular mobilization (*RAB8A* and  
220 *RABD3D*) as well as antiviral *HERC5* were more highly expressed in IN-vaccinated NHPs whereas those  
221 associated with signaling (e.g., *AKT2*, *PDE4D*) were more down-regulated (Fig. 5E) compared to IM-  
222 vaccinated NHPs. DEGs uniquely upregulated in the IM group have roles in protein synthesis and folding  
223 (e.g., *TRMT10B*, *TRNAU1AP*, *HSPB1*), cell proliferation (e.g., *KITLF*, *TM4SF19*) and T cell activation (e.g.,  
224 *CRACR2A*, *SH2D2A*) (Fig. 5G).

225 Due to limited sample availability, we were unable to perform phenotyping of immune cells in  
226 the BAL. Therefore, we performed *in silico* flow cytometry to infer changes in cell frequencies based on  
227 the transcriptional landscape (Fig. S6F). This analysis predicted significant increases in the levels of  
228 monocytes, NK cells and stimulated CD4 Th2 cells while frequencies of naïve & plasma B cell, CD4<sup>+</sup> &  
229 CD8<sup>+</sup> T cells, stimulated dendritic cells and neutrophils were predicted to decline for all three challenged



230 groups. On the other hand, plasma cells and monocytes were predicted to be induced to a lower  
231 magnitude in controls compared to IM and IN groups (Fig. S6F).

232

### 233 *Transcriptional analysis of lung samples*

234 As described for BAL samples, we observed a clear distinction between lung samples of  
235 uninfected/naïve compared to vaccinated and challenged NHPs with no clear separation between the  
236 three challenged groups, therefore, we employed the same strategy as described above for BAL (Fig.  
237 S7A). A robust transcriptional response to SARS-CoV-2 infection was evident in all three vaccinated  
238 groups compared to naïve animals (Fig. S7B) with the majority of DEGs shared among the three groups  
239 (Fig. 6A). Downregulated DEGs shared by all three vaccinated groups enriched to GO terms primarily  
240 involved in innate immunity (e.g., “regulation of innate immune response”, “antigen processing and  
241 presentation”), cellular stress (e.g., “coagulation”, “response to decreased oxygen levels”, “wound  
242 healing”) and cell cycle (e.g., “regulation of cell cycle process”) (Fig. 6B). Genes playing roles in protein  
243 folding and turnover (*CALR* and *CTSF*), immune activation (e.g., *LYN* and *ADA*) coagulation (e.g., *PLAT*,  
244 *SIRT2*, *FERMT3*), fluid homeostasis (e.g., *ADM*, *SERPINA5*) and cell morphogenesis (e.g., *NOTCH4*, *TEK*)  
245 were more suppressed in the IN group (Fig. 6C and S7C). Shared upregulated DEGs enriched to GO terms  
246 reflecting innate immune processes (e.g., “regulated exocytosis”, “myeloid leukocyte activation”,  
247 “neutrophil degranulation”), as well as cell migration (e.g., “chemotaxis”) and extracellular structural  
248 dynamics (e.g., “extracellular structural organization”, “cell projection morphogenesis”) (Fig. 6B).  
249 Overall, a large portion of these genes were induced to a greater extent in the IN group, notably those  
250 that play a role in neutrophil activation (e.g., *GRN*, *AZU1*, *CR1*), cell metabolism (e.g., *ALDOC*, *PGM1*,  
251 *IMPDH1*), chemotaxis (e.g., *CCL20*, *CCL8*, *CCL13*, *ICAM3*), and extracellular matrix remodeling (e.g.,  
252 *MMP25*, *MMP16*) (Fig. 6D, S7D). Additionally, genes important for angiogenesis and apoptosis were  
253 more upregulated in the IN group (e.g., *VEGFD*, *PRKD1*, *SHC1*, *DAB2IP*) (Fig. S7E).

254 We next analyzed vaccine route-specific DEGs to identify differences in the molecular responses  
255 to vaccination and challenge (Fig. 6E-H). Enrichment of the 161 DEGs unique to the IN group revealed  
256 enrichment to GO terms suggesting tissue injury (e.g., “lung development”), metabolism (e.g., “protein  
257 modification by small protein removal”), and signaling (e.g., “calcium-mediated signaling”) (Fig. 6F).  
258 Notably, downregulated DEGs in this group include components of the mitochondrial cellular respiration  
259 complex (e.g., *MT-CYB*, *MT-CO2*) and cellular homeostasis (e.g., *SKIV2L*, *PDE6C*, *SKIV2L*, *SHROOM4*) (Fig.  
260 6F).

261 In contrast, the 226 DEGs unique to the IM group enriched to GO terms related to cellular  
262 defense (e.g., type I interferon signaling pathway”, “TLR9 signaling”, “autophagy”), morphogenesis (e.g.,  
263 “epithelial cell morphogenesis”) and membrane dynamics (e.g., “protein localization to membrane”,)  
264 (Fig. 6G). The higher expression of DEGs related to the type I interferon response (e.g., *CDC37*, *USP18*,  
265 *IFI6*) and ribosome assembly (e.g., *MRRF*, *OGFOD1*, *FARSA*) in the IM and control groups suggests  
266 greater mobilization of host defense processes (Fig. 6H). Additionally, genes associated with cilia  
267 formation (e.g., *INPP5E*, *TMEM231*, *PPFIBP2*) and regulation of inflammation (e.g., *GLOD5*, *ITIH5*, *TIFAB*)  
268 were highly expressed in the IM group in line with reduced damage (Fig. 6H). *In silico* flow cytometry  
269 analysis indicated that these transcriptional changes were consistent with increases in the levels of  
270 neutrophils, monocytes, NK cells, dendritic cells and naïve lymphocytes in all the infected animals while  
271 frequencies of activated monocytes were predicted to decrease relative to tissue from naïve animals  
272 (Fig. S7F).

273

## 274 Discussion

275 Many vaccine platforms have been utilized to develop a COVID-19 vaccine quickly (13-16), with  
276 several already approved for human use within a year of SARS-CoV-2 emergence. However, many of  
277 these vaccines require 2 doses to elicit protection and are delivered IM rather than the site of infection.  
278 Therefore, we developed a single dose, fast-acting VSV-based vaccine against COVID-19, which is based  
279 on the rVSV-ZEBOV vaccine approved by the US Food and Drug administration (FDA) and the European  
280 Medicines Agency (EMA) for human use. Additionally, we compared the protective efficacy of IM and IN  
281 delivery in the rhesus macaque model (27).

282 A single dose IM-, but not IN-delivered vaccine protected NHPs from COVID-19 pneumonia  
283 within 10 days post vaccination. This short time to immunity is a tremendous advantage and highlights  
284 its potential to be used rapidly during a public health crisis, particularly in emergency situations when  
285 many people were exposed at once. Interestingly, IM vaccination resulted in superior immune response  
286 compared to IN as evidenced by the significantly higher SARS-CoV-2-S-specific antibody titers and lower  
287 viral loads in this group. None of the animals in this study showed overt clinical signs of disease  
288 regardless of their vaccination status. However, histological examination of the lung tissue revealed  
289 immunopathology that was most significant in IN-vaccinated animals. The observed immunopathology  
290 was not consistent with a classic hypersensitivity response or immune-enhanced disease as the lesions  
291 were limited to the periphery of lung lobes and almost exclusively observed in lower lung lobes as

292 previously reported for SARS-CoV-2 infection (27). Importantly, IM-vaccinated animals did not develop  
293 signs of interstitial pneumonia, nor could we detect SARS-CoV-2 antigen in the lungs. Indeed, at the time  
294 of euthanasia, lung lesions were apparent in animals from the IN and controls groups, but not in the IM  
295 group. This is surprising given mucosal vaccination for other respiratory pathogens has been  
296 demonstrated to be superior or comparable to IM (30, 31). It possible that the immunopathology  
297 observed in the vaccinated animals is due to the short duration between vaccination and challenge (10  
298 days) and that it might also occur with other SARS-CoV-2 vaccine platforms, as this change was clinically  
299 silent in our model.

300 In line with the observations above, the transcriptional analysis of lung samples showed a  
301 divergence of antiviral states between the IN, IM and control groups. IN vaccination induced  
302 transcriptional changes enriched to cell metabolism, apoptosis, angiogenesis, and neutrophil activation  
303 processes. Some notable DEGs include genes associated with neutrophil activation and the formation of  
304 azurophil granules (e.g. *GRN*, *CR1*, and *AZU1*). While neutrophils play a role in protecting the host,  
305 sustained neutrophil activation has been shown to directly correlate to more severe COVID-19 cases  
306 (32). In contrast, IM vaccination induced transcriptional changes playing a role in cilia formation,  
307 inflammation regulation, and type I IFN. A majority of these genes are responsible for the regulation and  
308 control of early innate inflammation such as *USP18* which disrupts the JAK-STAT pathway downstream  
309 of the IFN receptor (33), and *TIFAB* which inhibits the activation of the NF $\kappa$ B pathway (34). Collectively  
310 these findings support the significant decrease in virus replication between the IN and IM vaccination  
311 groups. Transcriptional analysis of acute BAL samples also demonstrated a divergence of antiviral states  
312 evidenced by T cell differentiation genes upregulated after IM vaccination compared to innate antiviral  
313 posttranslational modifications after IN vaccination. While variable immunopathology was observed in  
314 all VSV-SARS2-EBOV-vaccinated NHPs regardless of the route, transcriptional analysis of the BAL  
315 demonstrated an upregulation of antiviral genes such as *HERC5* in the IN group only, in line with  
316 enhanced viral loads in this group. *HERC5* is responsible for the production of *HECT*-type E3 protein  
317 ligase, a facilitator of the ISG conjugation system of interferon stimulated gene 15 (35) possibly  
318 contributing to the enhanced immunopathology observed in the IN group.

319 Since the importance of a cellular immune response has been recently highlighted in COVID-19  
320 patients (36), we assessed development of both innate as well as the adaptive cellular responses  
321 following each vaccination strategy. Our analysis showed a higher frequency of granzyme B<sup>+</sup> NK cells  
322 after IM vaccination. While there was minimal antigen-specific cytokine production from the CD4<sup>+</sup> T  
323 cells, a significant increase in the early activation marker, CD69, was observed on 0 and 7 dpc. In

324 addition, an increase in the IL-2 production was only observed 7 dpc, indicative of the priming of  
325 cytotoxic CD8<sup>+</sup> T cells (37). Transcriptional analysis revealed that IM vaccination induced upregulation of  
326 *CRACR2A* and *SH2D2a*. *SH2D2a* encodes a T cell-specific adaptor protein, which facilitates the formation  
327 and maintenance of the immunological synapse between the antigen presenting cell and the T cell  
328 receptor allowing for a more robust antigen-specific stimulation (38). *CRACR2A* also has a role in the  
329 maintenance of the immunological synapse and promotes downstream signaling, which results in an  
330 increased Th1 response and Th17 effector functions which is supported by the significant decrease of IL-  
331 2 on 0 dpc (39).

332 Serum cytokine analyses demonstrated a significant increase in IL-18 and innate chemokines,  
333 MCP-1 and MIP-1 $\beta$ , circulating in animals that presented with severe pathology. The increased  
334 expression of IL-18 could indicate a priming of the infiltrating immune cells in the lungs to a more  
335 proinflammatory state that would result in the observed tissue destruction. However, we did not  
336 observe an increase of IL-18 in BAL samples from 3 dpc. The most striking observation was the  
337 significant downregulation of MIP-1 $\beta$  on all dpc measured in IM-vaccinated animals. MIP-1 $\beta$  and MCP-1  
338 have previously been demonstrated to be indicators of severe COVID-19 pathogenesis by transcriptomic  
339 profiling of human patients (40). A decrease in MIP-1 $\beta$  and MCP-1 could contribute to the lack of  
340 immune cell infiltration in the lungs of the IM group. Predicted *in silico* flow cytometry data from BAL on  
341 3 dpc showed a decrease of naïve and plasma B cells, CD4<sup>+</sup> and CD8<sup>+</sup> T cells, stimulated dendritic cells  
342 and neutrophils supporting this hypothesis. Furthermore, *in silico* flow cytometry from the lungs on 7  
343 dpc were indicative of a decrease in activated monocytes for all SARS-CoV-2-infected NHPs. Further  
344 immune cell characterization from BAL and within the lungs is needed to expand upon our results and  
345 confirm this hypothesis.

346 In summary, in this study we generated a potent single-dose, fast-acting vaccine for COVID-19.  
347 This vaccine grows to high titers like the parent rVSV-ZEBOV vector and to higher titers compared to a  
348 VSV vaccine expressing the SARS-CoV-2 S alone (41)(unpublished data). Several important questions  
349 remain to be addressed in future studies. An extension of the time between vaccination and challenge  
350 might overcome the observed difference in protection between the vaccination routes and might  
351 eliminate the signs of immunopathology. This aspect will be investigated in future studies in conjunction  
352 with assessing the durability of SARS-CoV-2-specific immunity and a possible dose reduction of the  
353 vaccine as has been described for the rVSV-ZEBOV, the parental vaccine (42). The rVSV-ZEBOV has been  
354 shown to elicit a durable humoral response, which lasts for at least 2 years in humans (43). We will also  
355 investigate the addition of another SARS-CoV-2 antigen into the vaccine to promote a stronger T cell

356 response as these responses are typically longer lasting. Furthermore, we will analyze if pre-existing  
357 immunity to EBOV could impact the immunogenicity of this bivalent vaccine. For now, the VSV-SARS2-  
358 EBOV vaccine presents a vaccine with a high potential as a boosting option after the already approved  
359 mRNA-based vaccine because the VSV-SARS2-EBOV elicits primarily a humoral response in contrast to  
360 the predominantly T cell-driven immune response after mRNA vaccination (16).

361

## 362 **Materials and Methods**

### 363 *Ethics statement*

364 All infectious work with SARS-CoV-2 was performed in the high containment laboratories at the  
365 Rocky Mountain Laboratories (RML), Division of Intramural Research, National Institute of Allergy and  
366 Infectious Diseases, National Institutes of Health. RML is an institution accredited by the Association for  
367 Assessment and Accreditation of Laboratory Animal Care International (AAALAC). All procedures  
368 followed standard operating procedures (SOPs) approved by the RML Institutional Biosafety Committee  
369 (IBC). Animal work was performed in strict accordance with the recommendations described in the  
370 Guide for the Care and Use of Laboratory Animals of the National Institute of Health, the Office of  
371 Animal Welfare and the Animal Welfare Act, United States Department of Agriculture. The studies were  
372 approved by the RML Animal Care and Use Committee (ACUC). Procedures were conducted in animals  
373 anesthetized by trained personnel under the supervision of veterinary staff. All efforts were made to  
374 ameliorate animal welfare and minimize animal suffering in accordance with the Weatherall report on  
375 the use of nonhuman primates in research

376 (<https://royalsociety.org/policy/publications/2006/weatherall-report/>). Animals were housed in  
377 adjoining individual primate cages that enabled social interactions, under controlled conditions of  
378 humidity, temperature, and light (12 hours light - dark cycles). Food and water were available *ad libitum*.  
379 Animals were monitored and fed commercial monkey chow, treats, and fruit at least twice a day by  
380 trained personnel. Environmental enrichment consisted of commercial toys, music, video and social  
381 interaction.

382

### 383 *Animal study*

384 Sixteen female rhesus macaques (3.5-10 years of age; 4.5-10kg, Indian-origin) were used in this  
385 study. The NHPs were randomly selected for two vaccine groups (n=6) and one control group (n=4). On

386 day-10 NHPs received a single vaccine dose of  $1 \times 10^7$  PFU of VSV-SARS2-EBOV by the IM (injection caudal  
387 thigh) or IN route (dropping vaccine into each nostril). Control animals received the same dose of a  
388 control vaccine (VSV-EBOV) by the IM (n=2) or IN (n=2) route (Fig. S1D). On day 0, animals were  
389 challenged with SARS-CoV-2 as previously described (27). On day 0, 1, 3, 5 and 7 after challenge a clinical  
390 exam was performed including thoracic radiograph and nasal swab collection. The day 3 exam included  
391 bronchoalveolar lavage (BAL) using 10 ml sterile saline. On day 7, all animals were euthanized for sample  
392 collection.

393

#### 394 *Cells and Viruses*

395 Huh7 and VeroE6 cells were grown at 37°C and 5% CO<sub>2</sub> in Dulbecco's modified Eagle's medium  
396 (DMEM) (Sigma-Aldrich, St. Louis, MO) containing 10% fetal bovine serum (FBS) (Wisent Inc., St. Bruno,  
397 Canada), 2 mM L-glutamine (Thermo Fisher Scientific, Waltham, MA), 50 U/mL penicillin (Thermo Fisher  
398 Scientific), and 50 µg/mL streptomycin (Thermo Fisher Scientific). BHK-T7 (baby hamster kidney) cells  
399 expressing T7 polymerase were grown at 37°C and 5% CO<sub>2</sub> in minimum essential medium (MEM)  
400 (Thermo Fisher Scientific) containing 10% tryptose phosphate broth (Thermo Fisher Scientific), 5% FBS, 2  
401 mM L-glutamine, 50 U/mL penicillin, and 50 µg/mL streptomycin. SARS-CoV-2 isolate nCoV-WA1-2020  
402 (MN985325.1) (44) was used for the animal challenge studies and neutralization test.

403

#### 404 *Generation of VSV-based vaccine candidates*

405 The SARS-CoV-2 S ORF was PCR-amplified from an expression plasmid encoding the codon-  
406 optimized (human) gene based on GenBank accession number MN908947 which was kindly provided by  
407 Vincent Munster (NIAID). Full-length SARS-CoV-2 S was cloned into the pATX-VSV-EBOV plasmid  
408 upstream of the EBOV-Kikwit GP resulting in VSV-SARS2-EBOV (Fig. S1A) following a previously  
409 successful strategy (45). The replication-competent recombinant VSV was recovered in BHK-T7 cells as  
410 described previously (26). VSV-SARS2-EBOV was propagated on Huh7 cells. The complete sequence of  
411 the virus was confirmed by Sanger sequencing. The titer of the virus stock was quantified using standard  
412 plaque assay on VeroE6 cells.

413

#### 414 *Growth kinetics*

415 VeroE6 cells were grown to confluency in a 12-well plate and infected in triplicate with VSVwt,  
416 VSV-EBOV, or VSV-SARS2-EBOV at a multiplicity of infection of 0.01. After 1 h incubation at 37°C, cells  
417 were washed three times with plain DMEM, and covered with DMEM containing 2% FBS. Supernatant

418 samples were collected at 0, 6, 12, 24, 48, 72, and 96 hours post infection and stored at  $-80^{\circ}\text{C}$ . The titer  
419 of the supernatant samples was determined performing TCID<sub>50</sub> assay on VeroE6 cells as previously  
420 described (26).

421

#### 422 *Western blot analysis*

423 Supernatant samples containing VSV were mixed 1:1 with sodium dodecyl sulfate-  
424 polyacrylamide (SDS) gel electrophoresis sample buffer containing 20%  $\beta$ -mercaptoethanol and heated  
425 to  $99^{\circ}\text{C}$  for 10 min. SDS-PAGE and transfer to Trans-Blot polyvinylidene difluoride membranes (Bio-Rad  
426 Laboratories) of all samples was performed as described elsewhere (22). Protein detection was  
427 performed using anti-SARS-CoV-2 S RBD (1:1000; Sino Biological) or anti-EBOV GP (ZGP 12/1.1, 1  $\mu\text{g}/\text{ml}$ ;  
428 kindly provided by Ayato Takada, Hokkaido University, Japan) or anti-VSV M (23H12, 1:1000; Kerast  
429 Inc.). After horse-radish peroxidase (HRP)-labeled secondary antibody staining using either anti-mouse  
430 IgG (1:10,000) or anti-rabbit IgG (1:5000) (Jackson ImmunoResearch), the blots were imaged using the  
431 SuperSignal West Pico chemiluminescent substrate (Thermo Fisher Scientific) and an iBright™ CL1500  
432 Imaging System (Thermo Fisher Scientific).

433

#### 434 *RNA extraction and RT-qPCR*

435 Blood, BAL fluid, and nasal swabs were extracted using the QIAamp Viral RNA Mini Kit (QIAGEN)  
436 according to manufacturer specifications. Tissues, a maximum of 30 mg each, were processed and  
437 extracted using the RNeasy Mini Kit (QIAGEN) according to manufacturer specifications. One step RT-  
438 qPCR for both genomic and subgenomic viral RNA was performed using specific primer-probe sets and  
439 the QuantiFast Probe RT-PCR +ROX Vial Kit (QIAGEN), in the Rotor-Gene Q (QIAGEN) as described  
440 previously (13). Five  $\mu\text{L}$  of each RNA extraction were run alongside dilutions of SARS-CoV-2 standards  
441 with a known concentration of RNA copies.

442

#### 443 *Enzyme-linked immunosorbent assay*

444 Serum and BAL samples from SARS-CoV-2-infected animals were inactivated by  $\gamma$ -irradiation and  
445 used in BSL2 according to IBC-approved SOPs. NUNC Maxisorp Immuno plates were coated with 50  $\mu\text{L}$  of  
446 1  $\mu\text{g}/\text{mL}$  of recombinant SARS-CoV-2 spike (S1+S2), SARS-CoV-2 RBD (Sino Biological) or EBOV GP  
447 antigen at  $4^{\circ}\text{C}$  overnight and then washed three times with phosphate buffer saline containing 0.05%  
448 Tween 20 (PBST). The plates were blocked with 3% skim milk in PBS for 3 hours at room temperature,  
449 followed by three additional washes with PBST. The plates were incubated with 50  $\mu\text{L}$  of serial dilutions

450 of the samples in PBS containing 1% skim milk for 1 hour at room temperature. After 3 washes with  
451 PBST, the bound antibodies were labeled using 50  $\mu$ l of 1:2,500 horse-radish peroxidase (HRP)-labeled  
452 anti-monkey IgG (H+L) (SeraCare Life Sciences) diluted in 1% skim milk in PBST. For the IgG subclass  
453 ELISAs the plates were incubated with samples at 4 °C overnight. After three washes with PBST, 50  $\mu$ l of  
454 1  $\mu$ g/mL Anti-rhesus IgG1 [ena], IgG2 [dio], IgG3 [tria], or IgG4 [tessera] (NHPRR) diluted in 1% skim milk  
455 in PBST was added and incubated for 1 h at room temperature. After 3 washes with PBST, the bound  
456 antibodies were labeled using 50  $\mu$ l of 1:10,000 HRP-labeled anti-mouse IgG (H+L) (SeraCare Life  
457 Sciences) diluted in 1% skim milk in PBST. For all ELISAs, after incubation for 1 h at room temperature  
458 and 3 washes with PBST, 50  $\mu$ l of KPL ABTS peroxidase substrate solution mix (SeraCare Life Sciences)  
459 was added to each well, and the mixture was incubated for 30 min at room temperature. The optical  
460 density (OD) at 405 nm was measured using a GloMax<sup>®</sup> explorer (Promega). The OD values were  
461 normalized to the baseline samples obtained on day -10 and the cutoff value was set as the mean OD  
462 plus standard deviation of the blank.

463

#### 464 *Virus neutralization assay*

465 The day before this assay, VeroE6 cells were seeded in 96-well plates. Serum samples were  
466 heat-inactivated for 30 min at 56°C, and 2-fold serial dilutions were prepared in DMEM with 2% FBS.  
467 Next, 100 TCID<sub>50</sub> of SARS-CoV-2 were added and the mixture was incubated for 1 hour at 37°C and 5%  
468 CO<sub>2</sub>. Finally, media was removed from cells and the mixture was added to VeroE6 cells and incubated at  
469 37°C and 5% CO<sub>2</sub> for 6 days. Then the CPE was documented, and the virus neutralization titer was  
470 expressed as the reciprocal value of the highest dilution of the serum which inhibited virus replication  
471 (no CPE).

472

#### 473 *Flow cytometry*

474 Rhesus macaque PBMCs were isolated from ethylene diamine tetracetic acid (EDTA) whole blood  
475 by overlay on a Histopaque<sup>®</sup>-1077 density cushion and separated according to manufacturers'  
476 instructions. Isolated PBMCs were resuspended in FBS with 10% DMSO and frozen at -80°C until  
477 analysis. For analysis of T cell intracellular cytokine production, cells were stimulated for 6 hours with  
478 1 $\mu$ g/ml SARS-CoV-S peptide pool, media, cell stimulation cocktail (containing PMA-Ionomycin,  
479 Biolegend), or Lassa virus (LASV) GP peptide pool together with 5 $\mu$ g/ml Brefeldin A (Biolegend).  
480 Following surface staining with Live/Dead-APCCy7, CD3-FITC, CD4-Alexa700, CD8-PeTexas Red, CD56-  
481 BV421 and CD69-PeCy7, cells were fixed with 4% paraformaldehyde (PFA) and stained intracellularly



482 with IFN $\gamma$ -BV605, IL-4-APC, IL-2-PerCPCy5.5 diluted in perm-wash buffer (Biolegend). For analysis of NK  
483 cell intracellular cytokine production, cells were stimulated as described above. Following surface  
484 staining with Live/Dead-APCCy7, CD3-FITC, CD4-PerCPCy5.5, CD8-PeTexas Red, CD16-Alexa700, and  
485 CD56-BV421, cells were fixed with 4% PFA and stained intracellularly with granzyme B-APC.  
486 Sample acquisition was performed on a Cytoflex-S (Beckman Coulter) and data analyzed in FlowJo V10  
487 (TreeStar). Antigen specific T cells were identified by gating on Live/Dead negative, doublet negative  
488 (SSC-H vs SSC-A), CD3<sup>+</sup>, CD56<sup>-</sup>, CD4<sup>+</sup> or CD8<sup>+</sup> cells and cytokine positive. Three NK cell sub-populations  
489 were identified by gating on Live/Dead negative, doublet negative (SSC-H vs SSC-A), CD3<sup>+</sup>, CD56<sup>-</sup>, and  
490 CD8<sup>+</sup> or CD16<sup>+</sup> or CD8<sup>+</sup>CD16<sup>+</sup> double positive. Cytokine responses for each sub-population were  
491 identified by gating on the population then granzyme B<sup>+</sup> cells. Cytokine positive responses are presented  
492 after subtraction of the background responses detected in the LASV GP peptide stimulated samples.

493

#### 494 *Cytokine analysis*

495 Macaque serum and BAL samples were inactivated by  $\gamma$ -irradiation and removed from the high  
496 containment laboratory according to IBC-approved SOPs. Samples were then diluted 1:2 in serum matrix  
497 for analysis with Milliplex Non-Human Primate Magnetic Bead Panel as per manufacturer's instructions  
498 (Millipore Corporation). Concentrations for each cytokine were determined for all samples using the Bio-  
499 Plex 200 system (BioRad Laboratories Inc.).

500

#### 501 *Histology and immunohistochemistry*

502 Necropsies and tissue sampling were performed according to IBC-approved SOPs. Lungs were  
503 perfused with 10% formalin and processed for histologic review. Harvested tissues were fixed for eight  
504 days in 10% neutral-buffered formalin, embedded in paraffin, processed using a VIP-6 Tissue Tek (Sakura  
505 Finetek, USA) tissue processor, and embedded in Ultratrain paraffin polymer (Cancer Diagnostics,  
506 Durham, NC). Samples were sectioned at 5  $\mu$ m, dried overnight at 42 °C, and resulting slides were  
507 stained with hematoxylin and eosin. Specific anti-CoV immunoreactivity was detected using an in-house  
508 SARS-CoV-2 nucleocapsid protein (U864YFA140-4/CB2093) rabbit antibody (Genscript) at a 1:1000  
509 dilution. The IHC assay was carried out on a Discovery ULTRA automated staining instrument (Roche  
510 Tissue Diagnostics) with a Discovery ChromoMap DAB (Ventana Medical Systems) kit. All tissue slides  
511 were evaluated by a board-certified veterinary pathologist. Sections taken at 3 levels from each lung  
512 lobe, totally 18 sections, were evaluated for each animal; a representative lesion from each group was  
513 selected for Fig. 3.

514

#### 515 *Library construction and sequencing*

516           Quality and quantity of RNA from BAL and lower left lung (LLL) were determined using an  
517 Agilent 2100 Bioanalyzer. cDNA libraries were constructed using the NEB Next Ultra II Direction RNA  
518 Library Prep Kit (Thermo Fischer). RNA was treated with RNase H and DNase I following depletion of  
519 ribosomal RNA (rRNA). Adapters were ligated to cDNA products and the subsequent ~300 base pair (bp)  
520 amplicons were PCR-amplified and selected by size exclusion. cDNA libraries were assessed for quality  
521 and quantity prior to 150 bp single-end sequencing using the Illumina NovaSeq platform.

522

#### 523 *Bioinformatic analysis*

524           Preliminary data analysis was performed with RNA-Seq workflow module of systemPipeR,  
525 developed by Backman *et. al* (46). RNA-Seq reads were demultiplexed, quality-filtered and trimmed  
526 using Trim Galore (average Phred score cut-off of 30, minimum length of 50 bp). FastQC was used to  
527 generate quality reports. Hisat2 was used to align reads to the reference genome *Macaca mulatta*  
528 (*Macaca\_mulatta.Mmul\_8.0.1.dna.toplevel.fa*) and the *Macaca\_mulatta.Mmul\_8.0.1.97.gtf* was used  
529 for annotation. For viral read quantification, RNA-Seq reads were separately aligned to the severe acute  
530 respiratory syndrome coronavirus 2 Wuhan isolate genome (NC\_045512.2) and the  
531 GCF\_009858895.2\_ASM985889v3\_genomic.gff annotation file was used. Raw expression values (gene-  
532 level read counts) were generated using the summarizeOverlaps function and normalized (read per  
533 kilobase of transcript per million mapped reads, rpkm) using the edgeR package. Statistical analysis with  
534 edgeR was used to determine differentially expressed genes (DEGs) meeting the following criteria: genes  
535 with median rpkm of  $\geq 5$ , a false discovery rate (FDR) corrected p-value  $\leq 0.05$  and a  $\log_2$  fold change  $\geq 1$   
536 compared to uninfected tissues. The number of total viral reads was determined as the total number of  
537 normalized read counts mapping to all viral genes.

538           Functional enrichment of DEGs was performed using Metascape to identify relevant Gene  
539 Ontology (GO) biological process terms and KEGG pathways. *In silico* flow cytometry was performed  
540 using ImmQuant with the IRIS database. Heatmaps, bubbleplots, Venn diagrams and violin plots were  
541 generated using R packages ggplot2 and VennDiagrams. GO network plots were generated in Cytoscape  
542 (Version 3.5.1). Graphs were generated using GraphPad Prism software (version 8).

543

#### 544 *Statistical analyses*

545 All statistical analysis was performed in Prism 8 (GraphPad). The *in vitro* growth kinetics of  
546 recombinant VSVs (Fig. S1C) was examined using two-way ANOVA with Tukey's multiple comparisons to  
547 evaluate statistical significance at all timepoints. Bioinformatics data were analyzed using one-way  
548 ANOVA with multiple comparisons, comparisons were made to either uninfected animals or control-  
549 vaccinated animals. Two-tailed Mann-Whitney's rank or Wilcoxon tests were conducted to compare  
550 differences between groups for all other data. A Bonferroni correction was used to control for type I  
551 error rate where required. Statistically significant differences are indicated as follows:  $p < 0.0001$  (\*\*\*\*),  
552  $p < 0.001$  (\*\*\*),  $p < 0.01$  (\*\*) and  $p < 0.05$  (\*).

553

#### 554 **Acknowledgements**

555 We thank the Rocky Mountain Veterinary Branch, NIAID for supporting the animal studies, and Anita  
556 Mora (NIAID) for assistance generating the pathology figures.

#### 557 **Funding**

558 The study was funded by the Intramural Research Program, NIAID, NIH. RNA sequencing was funded by  
559 the National Center for Research Resources and the National Center for Advancing Translational  
560 Sciences, NIH, through grant UL1 TR001414 awarded to I.M.

561

#### 562 **Author contributions**

563 A.M. conceived the idea and secured funding. W.F. and A.M. designed the studies. W.F., K.S., A.J.G., F.F.,  
564 A.O., T.G., J.L., P.W.H., T.T., C.S.C., K.L.O., and A.M. conducted the studies, processed the samples and  
565 acquired the data. A.N.P. and A.J. performed the transcriptomics work. W.F., K.S., A.N.P., C.S.C., I.M.,  
566 K.L.O., and A.M. analyzed and interpreted the data. W.F., I.M., K.L.O., and A.M. prepared the  
567 manuscript. All authors approved the manuscript.

568

#### 569 **Competing interest**

570 The authors declare no conflicts of interest.

571

#### 572 **Data availability**

573 All data is available in the manuscript or the supplementary materials.

574

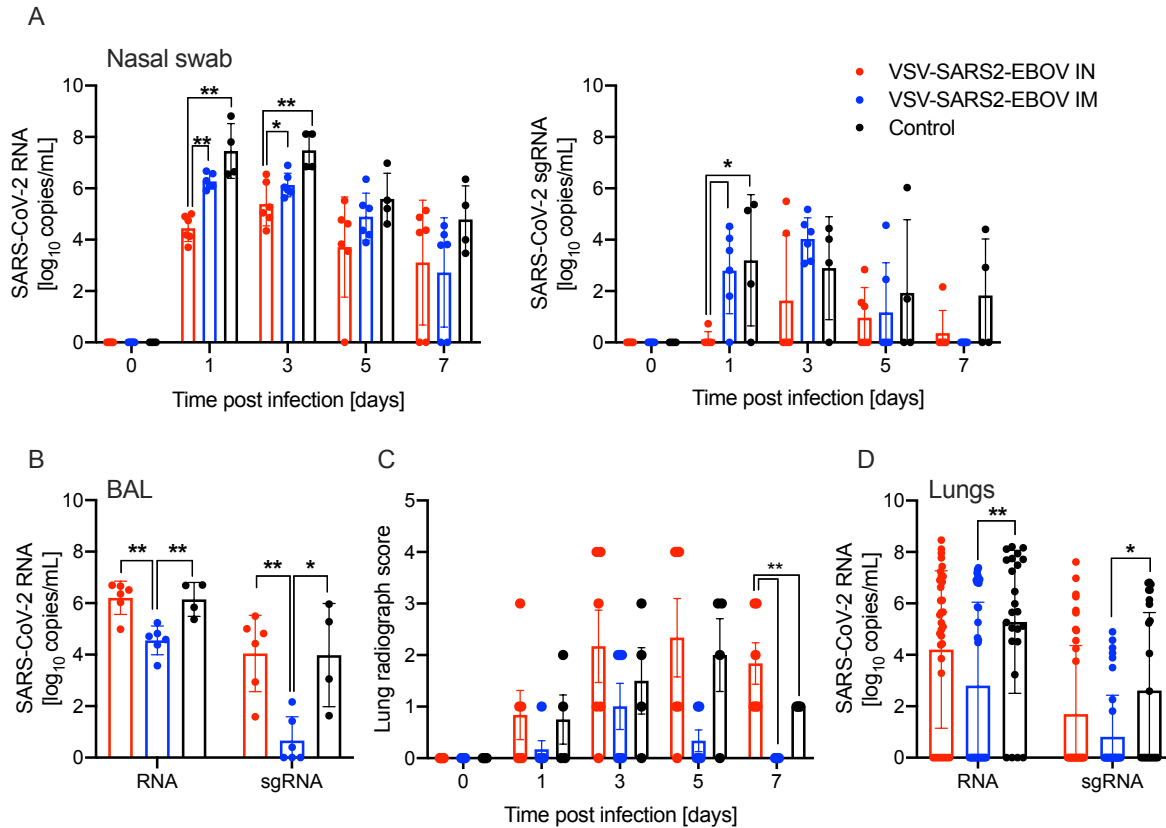

575  
 576 **Figure 1. SARS-CoV-2 loads in vaccinated NHPs.** Groups of 6 NHPs were IN or IM vaccinated with a  
 577 single dose of VSV-SARS2-EBOV; 4 control animals received the VSV-EBOV. **(A)** Total SARS-CoV-2-specific  
 578 RNA (left panel) and subgenomic (sg) RNA (right panel) in nasal swabs collected from NHPs. **(B)** Total  
 579 SARS-CoV-2-specific RNA and sgRNA in bronchoalveolar lavage (BAL) samples collected on day 3. **(C)**  
 580 Lung radiograph scores after challenge. Mean and standard deviation (SD) are shown. **(D)** Total SARS-  
 581 CoV-2-specific RNA and sgRNA in lung samples collected on day 7. **(A, B, D)** Geometric mean and  
 582 geometric SD are depicted. Statistical significance is indicated.

583

584

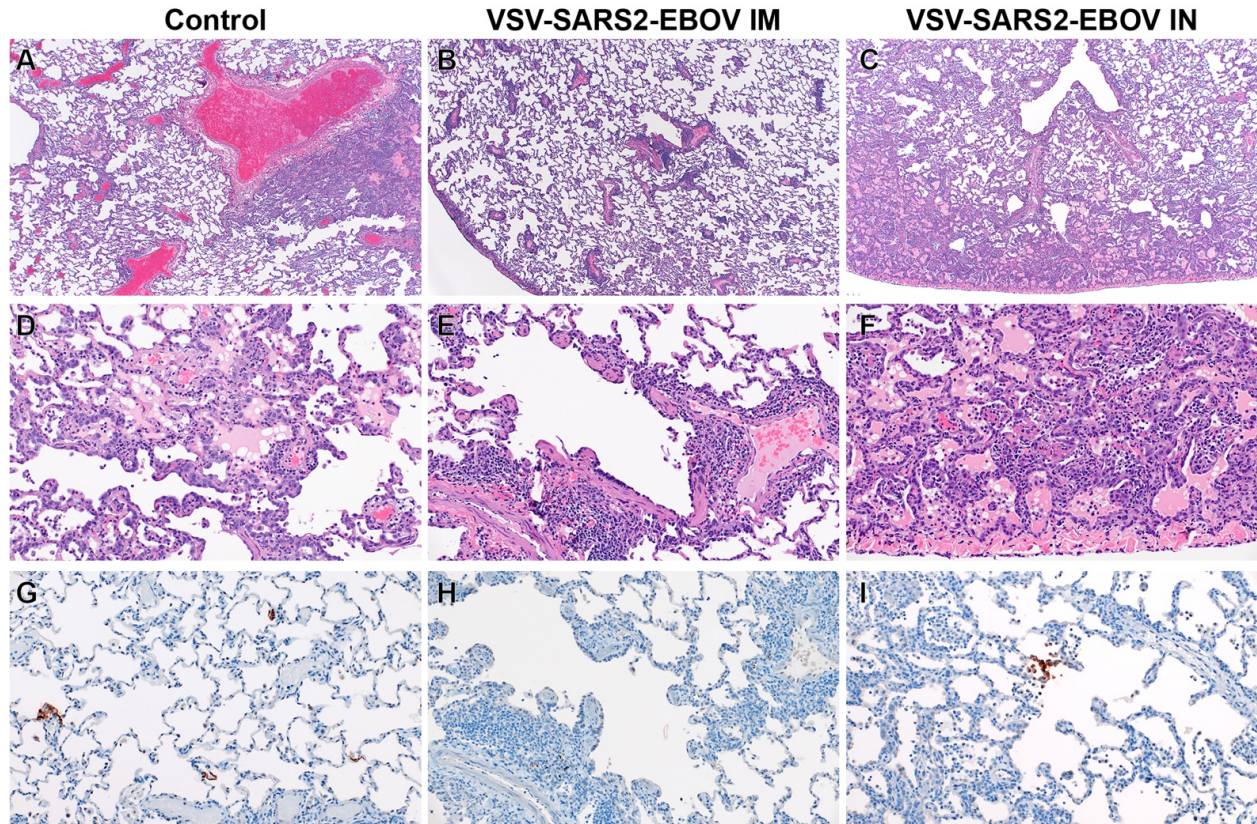

585  
586

587 **Figure 2. Histopathology and Immunohistochemistry of NHP lungs.** (A) Pulmonary lesions depicting  
588 typical coronavirus respiratory pathology including locally extensive regions of bronchioalveolar  
589 pneumonia and proteinaceous fluid accumulation in adjacent alveoli (40x, H&E). (B) Disseminated  
590 immunopathology with prominent perivascular lymphocytic cuffing and multifocal involvement at  
591 terminal airways (40x, H&E). (C) IN vaccination shows pulmonary pathology characterized by a  
592 combination of interstitial pneumonia and immunopathology (40x, H&E). (D) Foci of interstitial  
593 pneumonia are characterized by prominent type II pneumocyte hyperplasia, leukocyte infiltration and  
594 expansion of alveolar septa and accumulation of low numbers of macrophages, neutrophils and  
595 proteinaceous fluid in alveolar spaces (200x, H&E). (E) Terminal airways and medium to small caliber  
596 blood vessels are cuffed by moderate numbers of lymphocytes with scattered eosinophils (200x, H&E).  
597 (F) Foci of interstitial pneumonia show pronounced type II pneumocyte hyperplasia, thickening of  
598 alveolar septa by an infiltration of leukocytes and leukocyte spillover into adjacent alveolar spaces with  
599 moderate numbers of alveolar eosinophils noted and multifocal fibrin mats filling alveolar spaces (200x,  
600 H&E). (G) Low numbers of type I pneumocytes in regions lacking pathology are immunoreactive for  
601 SARS-CoV-2 antibody (200x, immunohistochemistry (IHC)). (H) SARS-CoV-2-specific immunoreactivity  
602 was not observed in evaluated sections of the IM vaccinated group (200x, IHC). (I) Low numbers of type I  
603 pneumocytes and alveolar macrophages are immunoreactive for SARS-CoV-2 in select foci of interstitial  
604 pneumonia (200x, IHC).

605

606

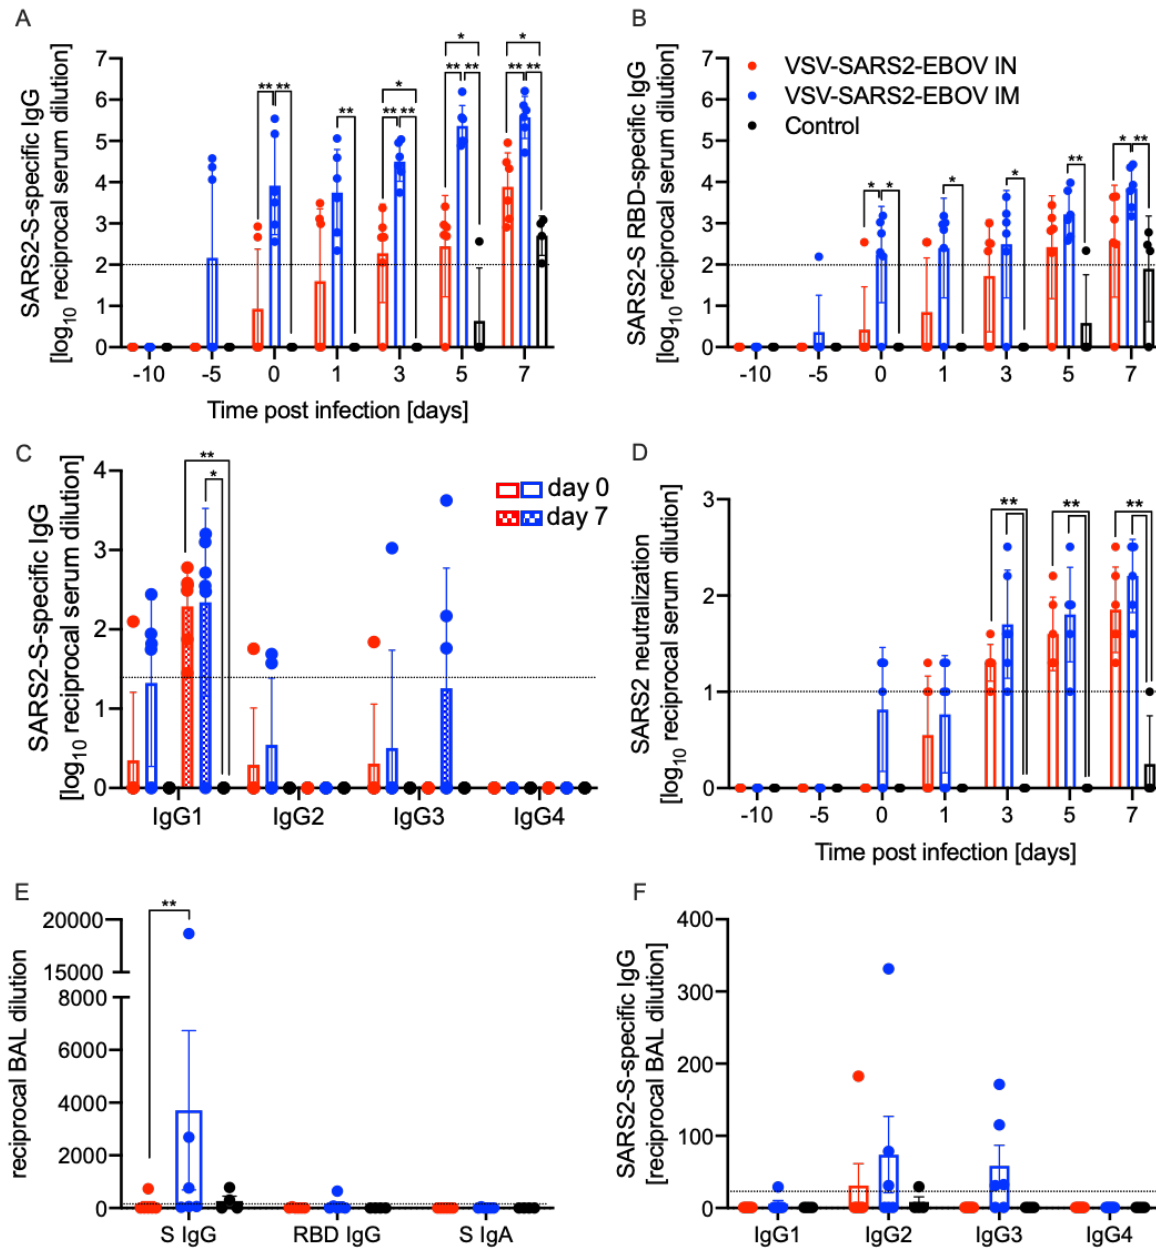

607  
608  
609  
610  
611  
612  
613  
614  
615  
616  
617  
618

**Figure 3. Humoral immune responses in NHPs.** Serum samples collected throughout the study from all NHPs were examined for (A) SARS-CoV-2 S-specific IgG, (B) SARS-CoV-2 S receptor binding domain (RBD)-specific IgG or (C) IgG subclasses specific to SARS-CoV-2 S by ELISA. (D) Neutralizing titers to SARS-CoV-2 were determined. (E) Bronchoalveolar lavage (BAL) samples were analyzed for SARS-CoV-2 S-specific IgG (S IgG) or IgA (S IgA), and SARS CoV-2 S RBD-specific IgG (RBD IgG) by ELISA. (A-D) Geometric mean and geometric standard deviation (SD) are depicted. (F) IgG subclasses specific to SARS-CoV-2 S in BAL samples were analyzed by ELISA. (E, F) Mean and SD are depicted. Statistical significance is indicated.

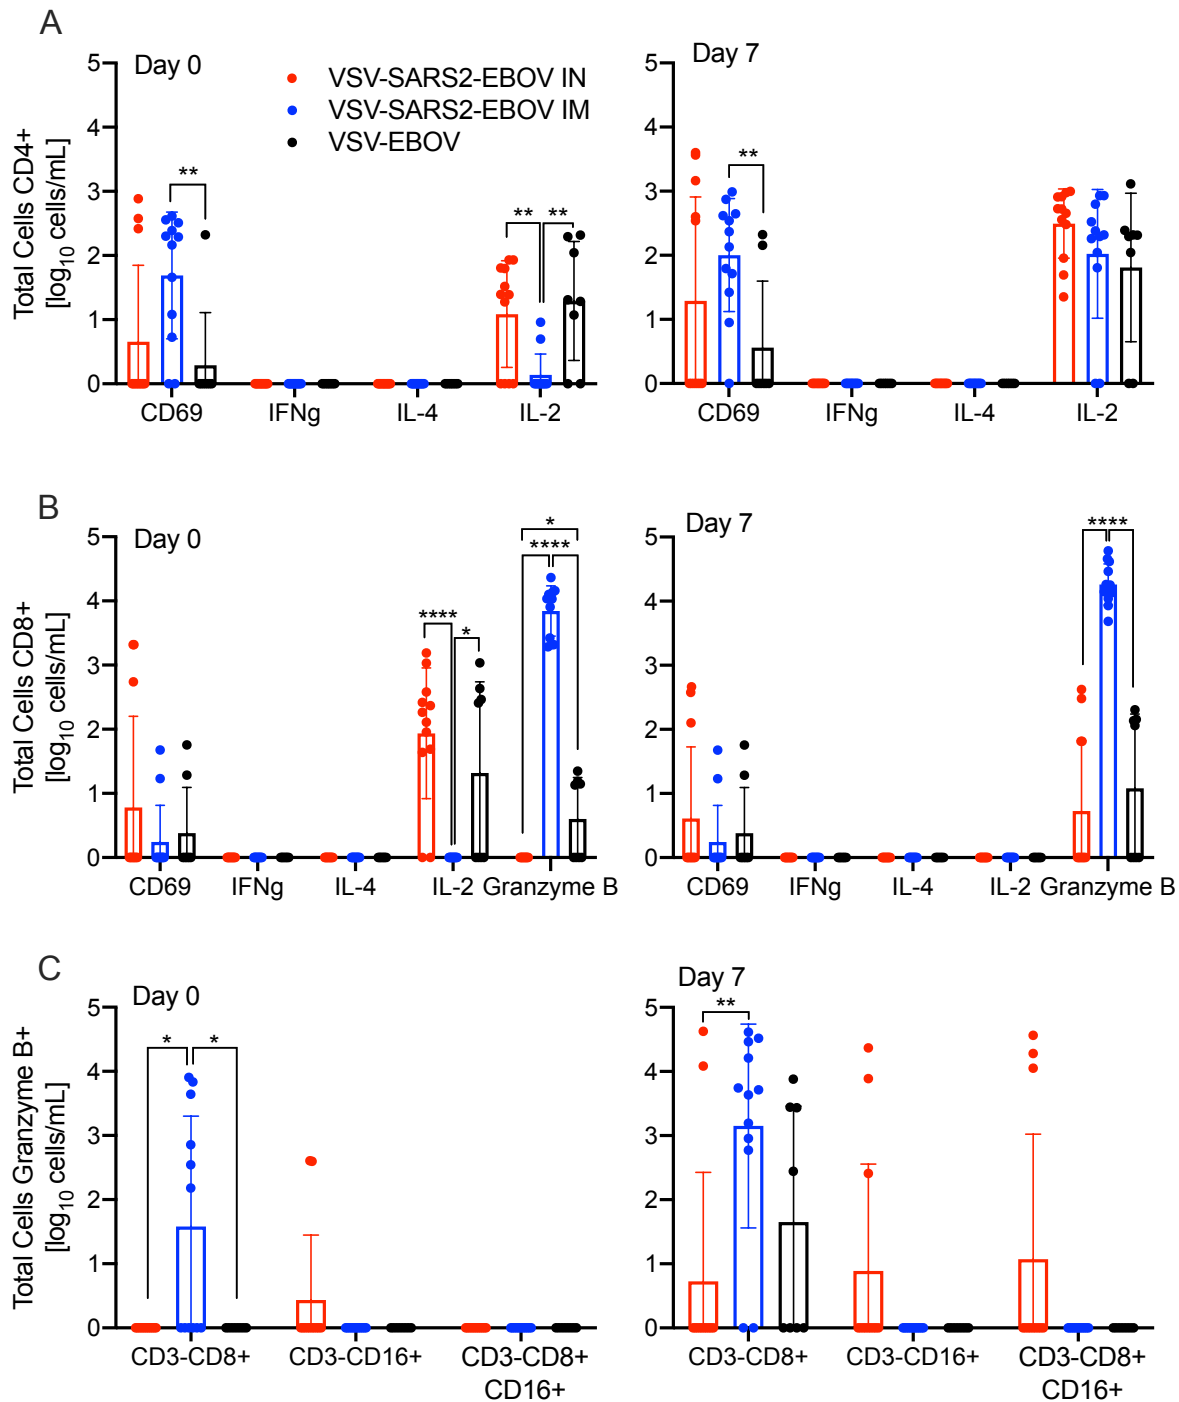

619  
 620 **Figure 4. Peripheral cellular immune response post challenge. (A)** CD4<sup>+</sup> T cells and from PBMCs were  
 621 stained for expression of early activation marker CD69 and intracellular cytokine staining (ICS) for IFN  $\gamma$ ,  
 622 IL-4, and IL-2 on day 0 and 7 post challenge. **(B)** CD8<sup>+</sup> T cells from PBMCs were phenotyped for  
 623 expression of early activation marker CD69 and ICS for IFN  $\gamma$ , IL-4, IL-2, and granzyme B on day 0 and 7  
 624 post challenge. **(C)** NK cell subpopulations were stained for the expression of granzyme B on day 0 and 7  
 625 post challenge. Data was measured in duplicate for all animals. Geometric mean and SD are depicted.  
 626 Statistical significance is indicated.

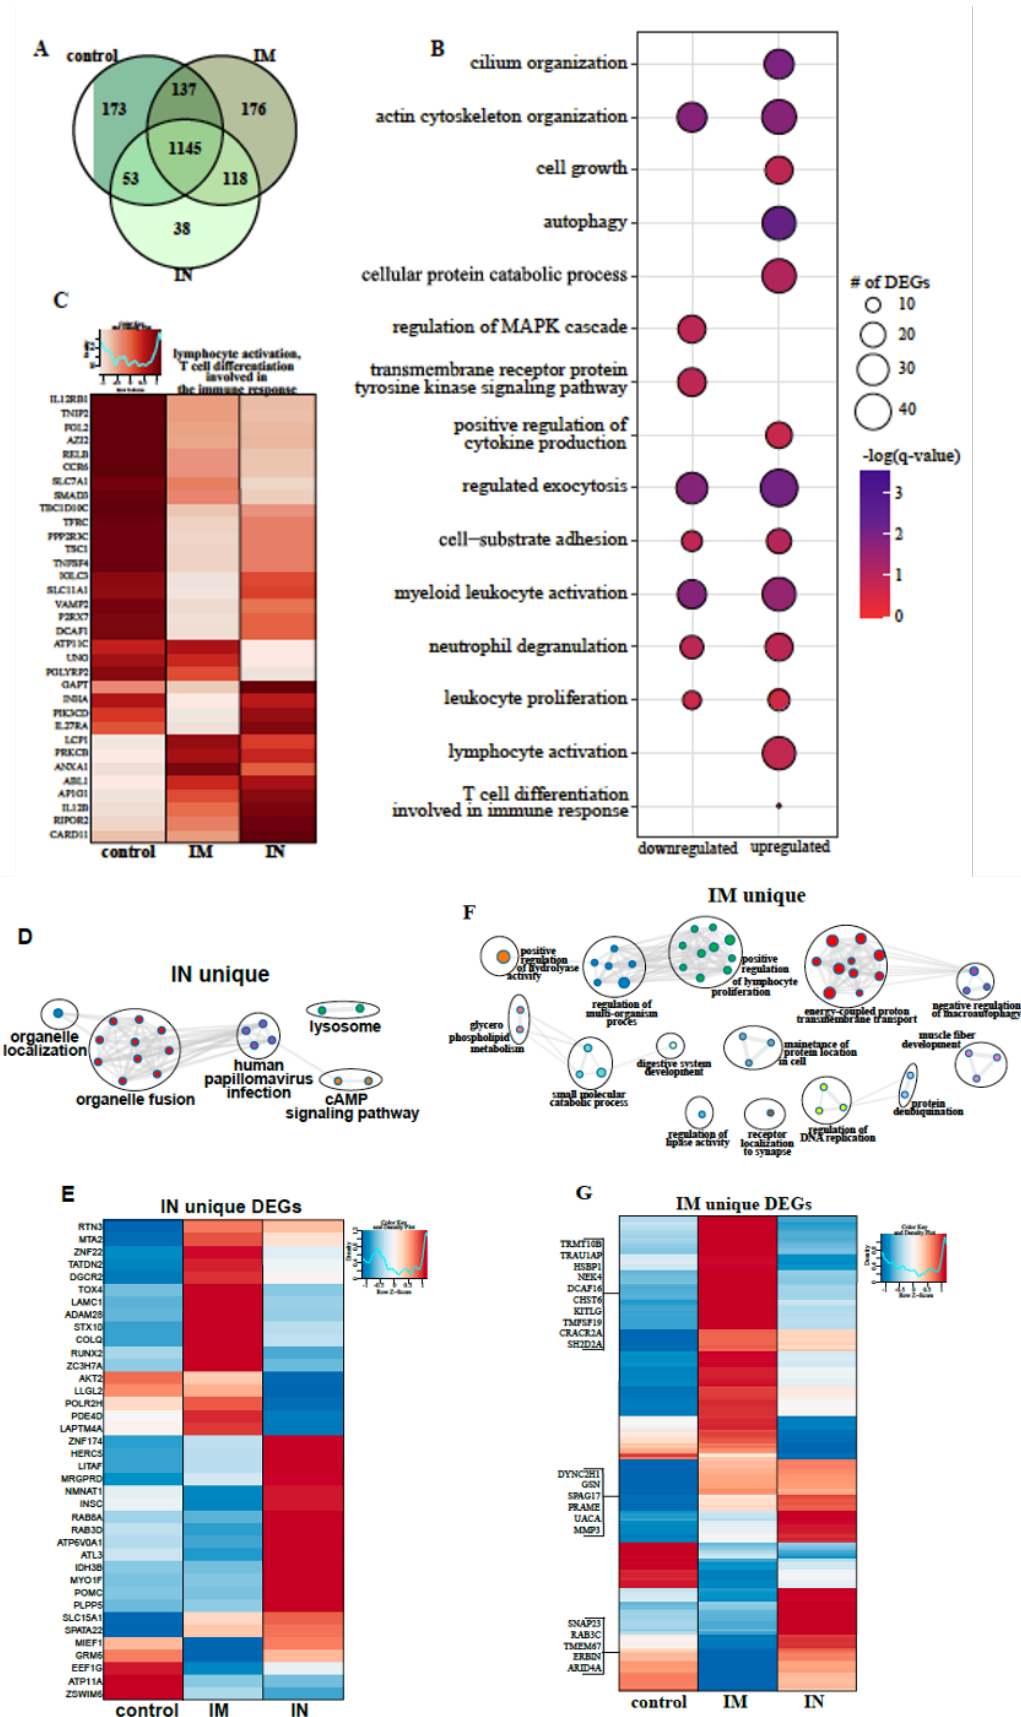



628 **Figure 5. BAL RNA-sequencing. (A)** Venn diagram of differentially expressed genes (DEGs) expressed 3  
629 days post challenge with SARS-CoV-2. Animals either received a control, intramuscular (IM) or intranasal  
630 (IN) vaccination. **(B)** Bubbleplot representing functional enrichment of DEGs shared by all infected  
631 groups at 3 days post challenge. Color intensity of each bubble represents the negative log of p-value  
632 and the relative size of each bubble represents the number of DEGs belonging to the specified Gene  
633 Ontology (GO) term. **(C)** Heatmap representing shared upregulated DEGs enriching to GO terms  
634 “lymphocyte activation” and “T cell differentiation involved in the immune response.” Expression is  
635 represented as the normalized rpkm, where each column represents the median rpkm of the given  
636 group. Range of colors is based on scale and centered rpkm values of the represented DEGs. GO term  
637 network depicting functional enrichment of DEGs unique to **(D)** IN and **(F)** IM using Mediascape. Color-  
638 coded clustered nodes correspond to one GO term or KEGG pathway. Node size represents the number  
639 of DEGs associated with the indicated term or pathway. Gray lines represent shared interactions  
640 between terms/pathways, with density and number indicating the strength of connections between  
641 closely related terms/pathways. Heatmaps representing DEGs unique to **(E)** IN and **(G)** IM. Exemplar  
642 DEGs are annotated. Red represents upregulation, blue presents downregulation. Each column  
643 represents the median rpkm of the given group. For all heatmaps, range of colors is based on scale and  
644 centered rpkm values of the represented DEGs.  
645  
646



648 **Figure 6. Lung RNA-Sequencing. (A)** Venn diagram of differentially expressed genes (DEGs) expressed 3  
649 days post challenge with SARS-CoV-2. Animals either received a control, intramuscular (IM) or intranasal  
650 (IN) vaccination. **(B)** Bubbleplot representing functional enrichment of DEGs shared by all infected  
651 groups at 7 days post challenge. Color intensity of each bubble represents the negative log of p-value  
652 and the relative size of each bubble represents the number of DEGs belonging to the specified Gene  
653 Ontology (GO) term. Heatmaps representing shared GO terms **(C)** “regulation of innate immune  
654 response”, “antigen processing and presentation of exogenous antigen” for downregulated DEGs; and  
655 **(D)** “regulated exocytosis”, “myeloid leukocyte activation” and “neutrophil degranulation” for  
656 upregulated DEGs. Expression is represented as the normalized rpkm, where each column represents  
657 the median rpkm of the given group. Range of colors is based on scale and centered rpkm values of the  
658 represented DEGs. GO term network depicting functional enrichment of DEGs unique to **(E)** IN and **(G)**  
659 IM using Mediascape. Color-coded clustered nodes correspond to one GO term or KEGG pathway. Node  
660 size represents the number of DEGs associated with the indicated term or pathway. Gray lines represent  
661 shared interactions between terms/pathways, with density and number indicating the strength of  
662 connections between closely related terms/pathways. Heatmaps representing DEGs unique to **(F)** IN and  
663 **(H)** IM. Exemplar DEGs are annotated. Red represents upregulation, blue presents downregulation. Each  
664 column represents the median rpkm of the given group. For all heatmaps, range of colors is based on  
665 scale and centered rpkm values of the represented DEGs.  
666  
667  
668  
669  
670

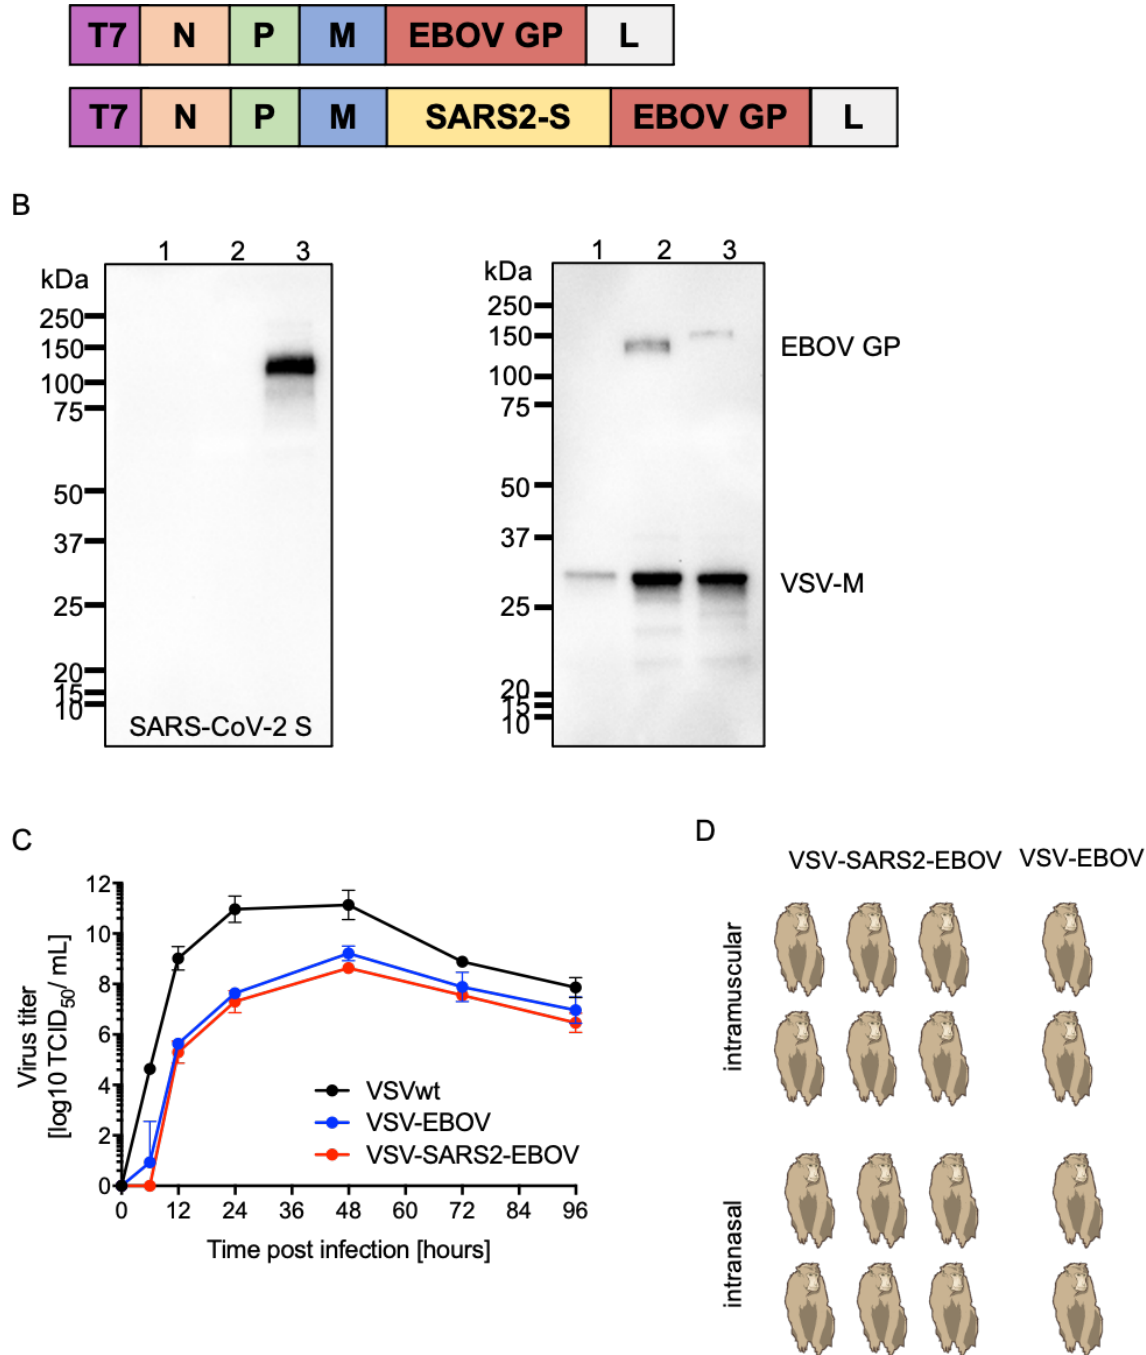

**Figure S1. Schematic and characterization of VSV-based vaccines. (A)** Schematic illustrating vaccine vector design. T7 promotor; N nucleoprotein; P phosphoprotein; M matrix protein; EBOV GP Ebola virus glycoprotein; L RNA-dependent RNA polymerase; SARS2-S SARS-CoV-2 S. **(B)** Western blot analysis of cell supernatant samples containing VSV vaccines probed for SARS-CoV-2 S (left), VSV M (middle) or EBOV GP (right). 1 VSV wildtype (VSVwt); 2 VSV- EBOV; 3 VSV- SARS2-EBOV. **(C)** Viral growth kinetics on VeroE6 cells. Geometric mean and SD are depicted. Results are not statistically significant. **(D)** Schematic outline of the rhesus macaque study.

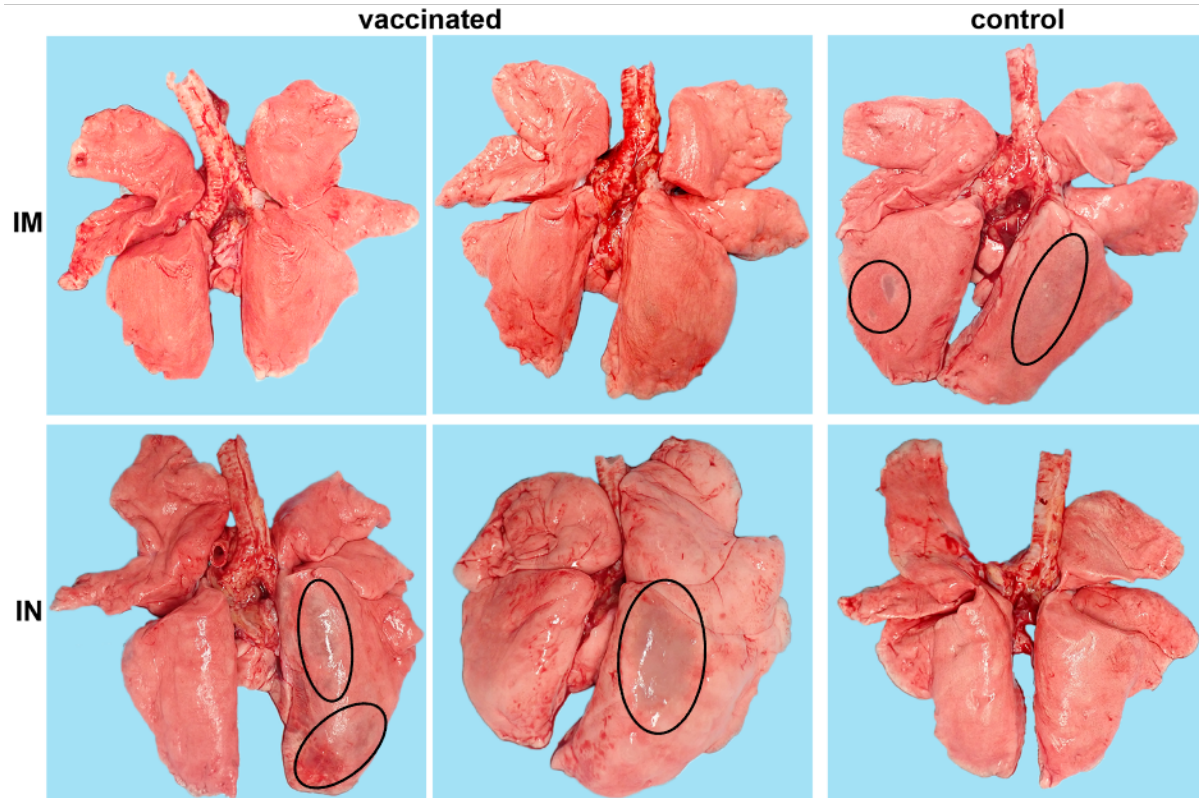

**Figure S2. Lung gross pathology of NHPs.** Representative pictures of NHP lungs with lesions on day 7 are shown. IM intramuscular vaccination; IN intranasal vaccination. Lesions are circled.

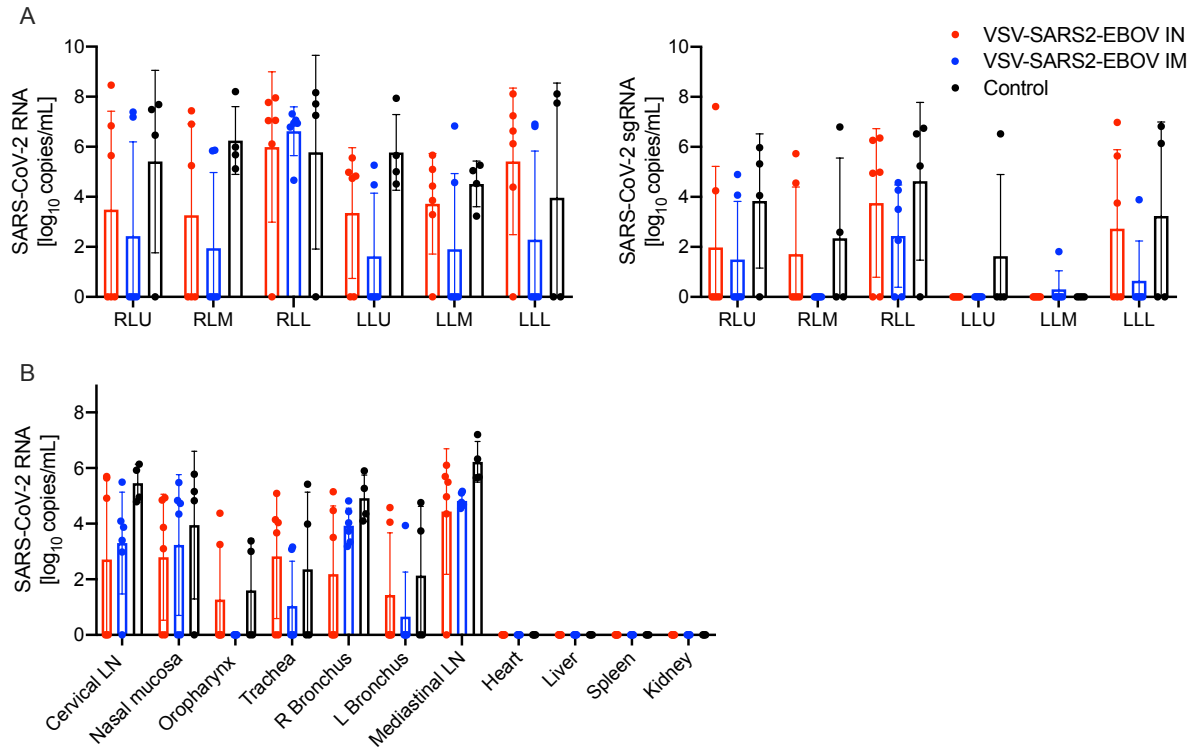

**Figure S3. Virus load in NHP tissue samples on day 7. (A)** Total SARS-CoV-2-specific RNA (left panel) and subgenomic (sg) RNA (right panel) in lung samples collected from NHPs. RLU right lobe upper; RLM right lobe middle; RLL right lobe lower; LLU left lobe upper; LLM left lobe middle; LLL left lobe lower. **(B)** Total SARS-CoV-2-specific RNA in tissue samples (right panel) from NHPs. LN lymph node; R right; L left.

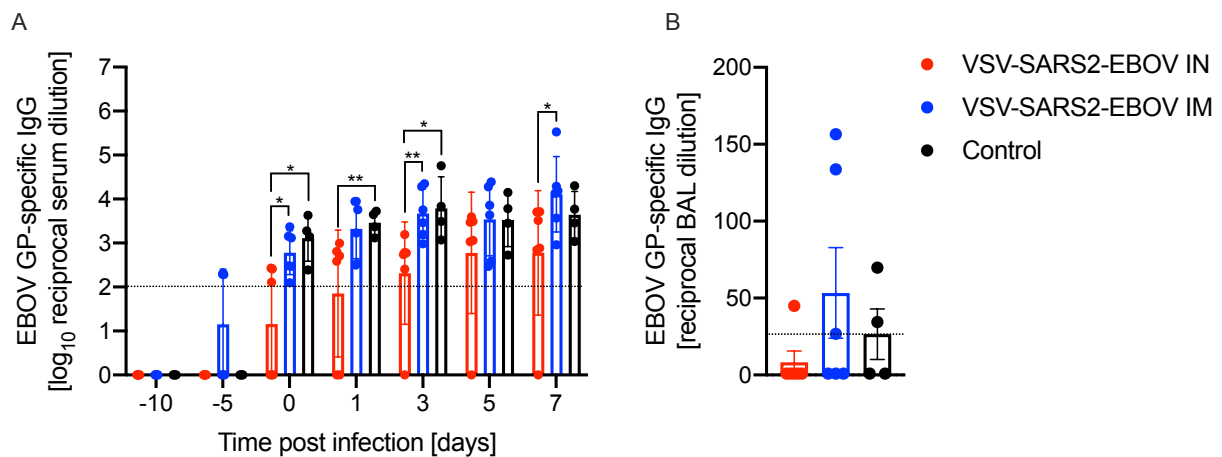

**Figure S4. EBOV GP-specific antibodies in NHPs after vaccination and challenge.** Bronchoalveolar lavage (BAL) samples collected on day 3 and serum samples collected throughout the study were analyzed by ELISA for EBOV GP-specific IgG. Statistical significance is indicated.

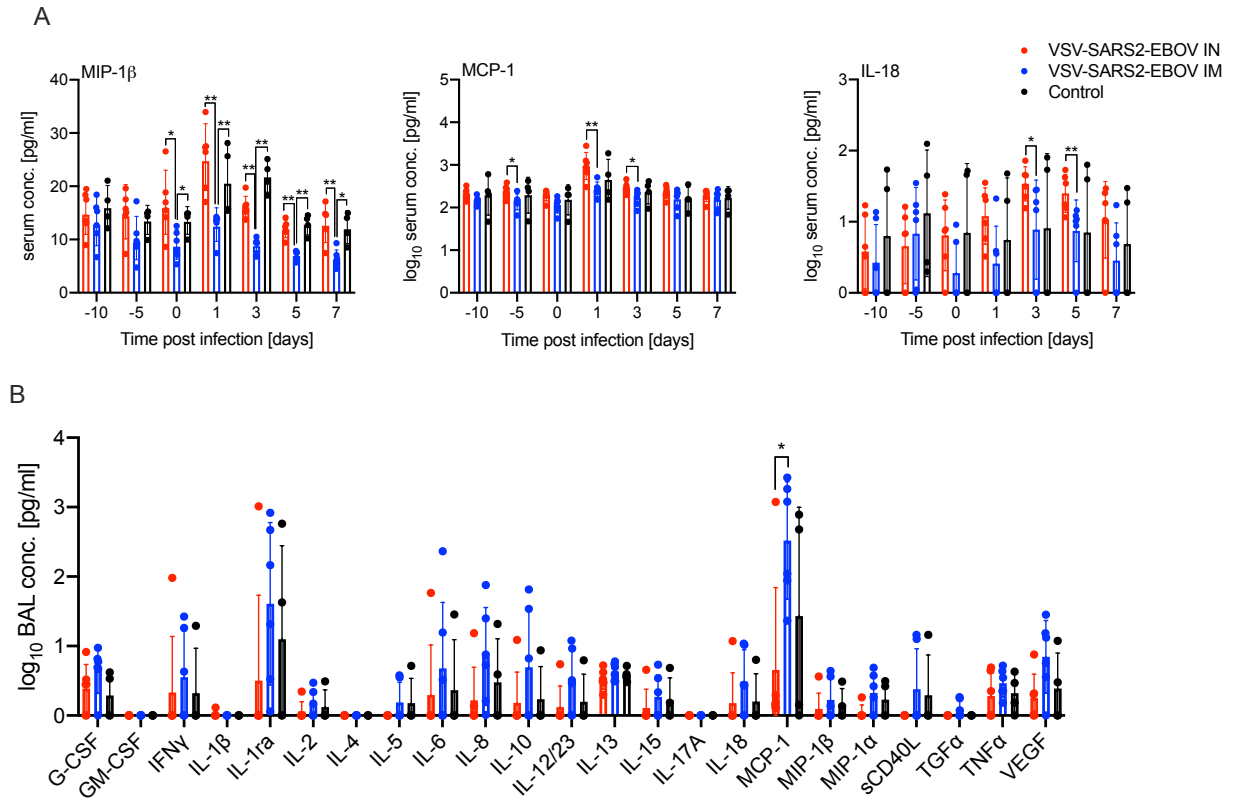

**Figure S5. Serum cytokine levels in NHPs after vaccination and challenge. (A)** Serum samples collected throughout the study and **(B)** bronchoalveolar lavage (BAL) samples collected on day 3 were analyzed. Statistical significance is indicated.

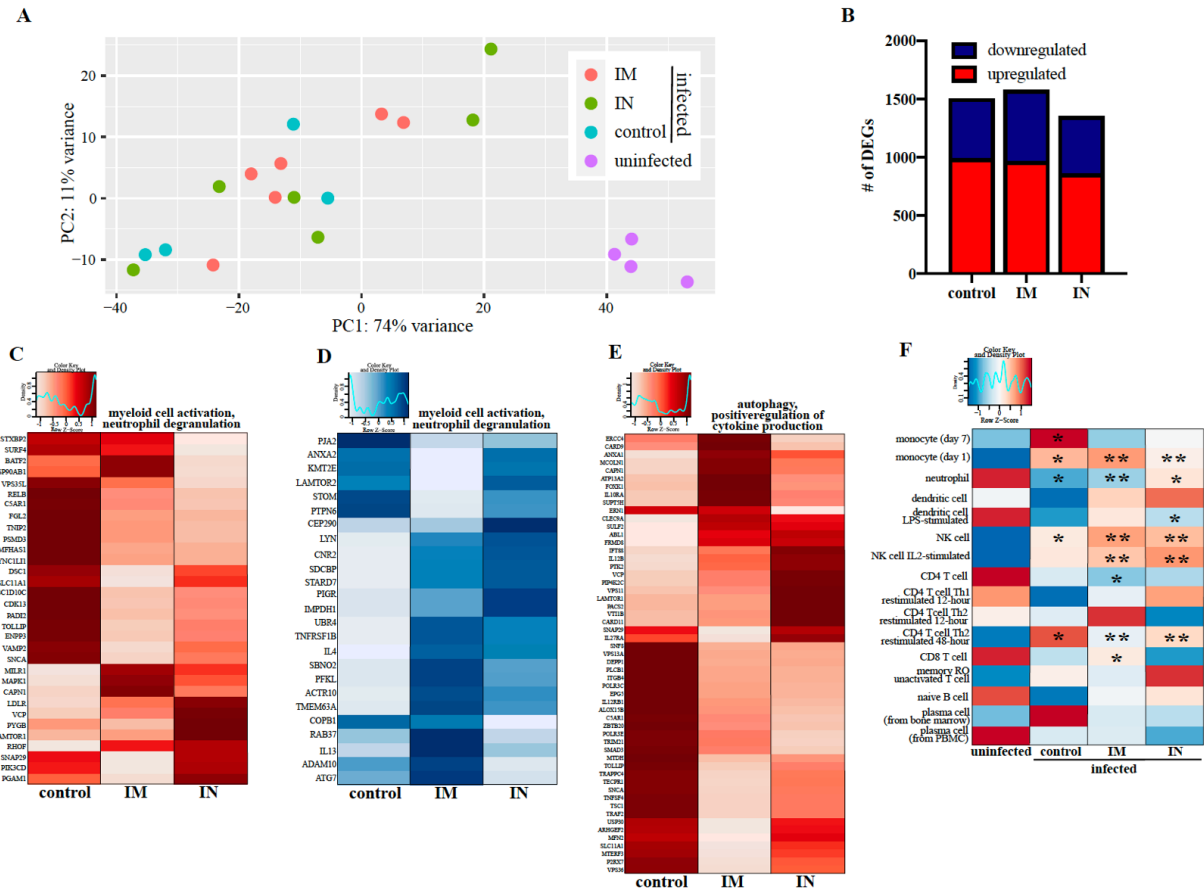

**Figure S6. BAL RNA-sequencing.** (A) Principal component analysis of bronchoalveolar lavage (BAL) samples from uninfected animals and vaccinated animals 3 days post challenge (control, intramuscular (IM) or intranasal (IN) vaccination). (B) Down- and up-regulated differentially expressed genes (DEGs). Heatmaps representing DEGs shared by all infected groups and enriching to Gene Ontology (GO) terms “myeloid cell activation” and “neutrophil degranulation” for (C) upregulated DEGs and (D) downregulated DEGs, and (E) “autophagy” and “positive regulation of cytokine production” for upregulated DEGs. Each column represents the median rpk of the given group. Range of colors is based on scale and centered rpk values of the represented DEGs. Red represents upregulated DEGs; blue represents downregulated DEGs. (F) *In silico* flow cytometry using ImmQuant IRIS database comparing challenged groups to uninfected controls. Red represents upregulation; blue represents downregulation. Each column represents the average relative predicted frequency of the given cell type. P-values are calculated relative to the uninfected animals. Statistical significance is indicated. For all heatmaps, range of colors is based on scale and centered rpk values of the represented DEGs.



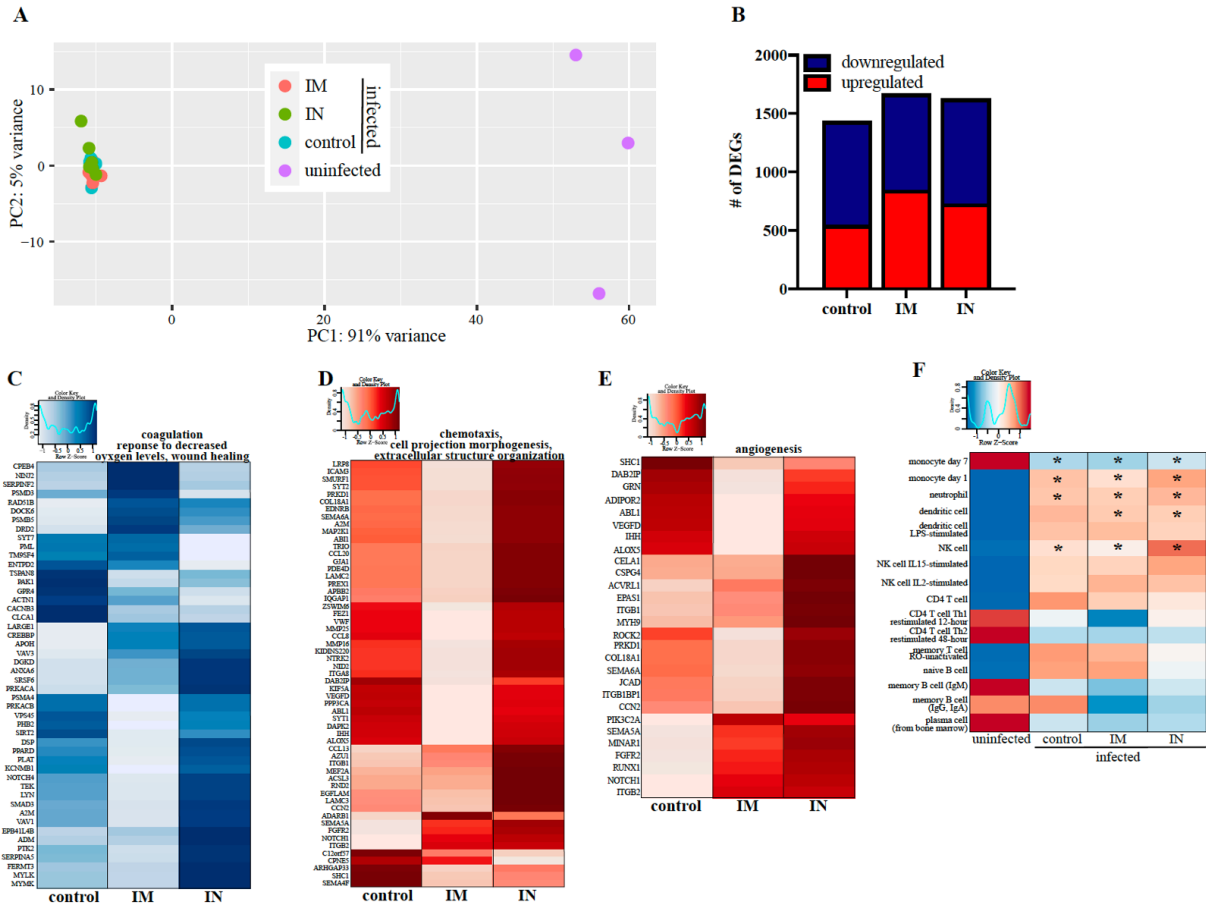

**Figure S7. Lung RNA-sequencing.** (A) Principal component analysis of lower left lung (LLL) samples from uninfected animals and vaccinated animals 7 days post challenge (control, intramuscular (IM) or intranasal (IN) vaccination). (B) Down- and up-regulated differentially expressed genes (DEGs). Heatmaps representing DEGs shared by all infected groups and enriching to Gene Ontology (GO) terms (C) “coagulation”, “response not decreased oxygen levels” and “wound healing” for downregulated DEG; and (D) “chemotaxis”, “cell projection morphogenesis” and “extracellular structure organization” and (E) “angiogenesis” for upregulated DEGs. Each column represents the median rpkms of the given group. Range of colors is based on scale and centered rpkms values of the represented DEGs. Red scale represents upregulated DEGs; blue scale represents downregulated DEGs. (F) *In silico* flow cytometry using ImmQuant IRIS database comparing challenged groups to uninfected controls. Red represents upregulation; blue represents downregulation. Each column represents the average relative predicted frequency of the given cell type. P-values are calculated relative to the uninfected animals. Statistical significance is indicated. For all heatmaps, range of colors is based on scale and centered rpkms values of the represented DEGs.

671 **References**

- 672 1. P. Zhou *et al.*, A pneumonia outbreak associated with a new coronavirus of probable bat  
673 origin. *Nature* **579**, 270-273 (2020).
- 674 2. W. J. Guan *et al.*, Clinical Characteristics of Coronavirus Disease 2019 in China. *N Engl J*  
675 *Med* **382**, 1708-1720 (2020).
- 676 3. E. W. Cheung *et al.*, Multisystem Inflammatory Syndrome Related to COVID-19 in  
677 Previously Healthy Children and Adolescents in New York City. *JAMA* **324**, 294-296  
678 (2020).
- 679 4. R. Mao *et al.*, Manifestations and prognosis of gastrointestinal and liver involvement in  
680 patients with COVID-19: a systematic review and meta-analysis. *Lancet Gastroenterol*  
681 *Hepatol* **5**, 667-678 (2020).
- 682 5. D. Wichmann *et al.*, Autopsy Findings and Venous Thromboembolism in Patients With  
683 COVID-19: A Prospective Cohort Study. *Ann Intern Med* **173**, 268-277 (2020).
- 684 6. F. Zhou *et al.*, Clinical course and risk factors for mortality of adult inpatients with  
685 COVID-19 in Wuhan, China: a retrospective cohort study. *Lancet* **395**, 1054-1062 (2020).
- 686 7. F. Wu *et al.*, A new coronavirus associated with human respiratory disease in China.  
687 *Nature* **579**, 265-269 (2020).
- 688 8. M. L. Holshue *et al.*, First Case of 2019 Novel Coronavirus in the United States. *N Engl J*  
689 *Med* **382**, 929-936 (2020).
- 690 9. Q. Li *et al.*, Early Transmission Dynamics in Wuhan, China, of Novel Coronavirus-Infected  
691 Pneumonia. *N Engl J Med* **382**, 1199-1207 (2020).
- 692 10. M. Letko, A. Marzi, V. Munster, Functional assessment of cell entry and receptor usage  
693 for SARS-CoV-2 and other lineage B betacoronaviruses. *Nat Microbiol* **5**, 562-569 (2020).
- 694 11. B. Ju *et al.*, Human neutralizing antibodies elicited by SARS-CoV-2 infection. *Nature* **584**,  
695 115-119 (2020).
- 696 12. A. O. Hassan *et al.*, A Single-Dose Intranasal ChAd Vaccine Protects Upper and Lower  
697 Respiratory Tracts against SARS-CoV-2. *Cell* **183**, 169-184 e113 (2020).
- 698 13. N. van Doremalen *et al.*, ChAdOx1 nCoV-19 vaccine prevents SARS-CoV-2 pneumonia in  
699 rhesus macaques. *Nature* **586**, 578-582 (2020).
- 700 14. J. Yu *et al.*, DNA vaccine protection against SARS-CoV-2 in rhesus macaques. *Science* **369**,  
701 806-811 (2020).
- 702 15. N. B. Mercado *et al.*, Single-shot Ad26 vaccine protects against SARS-CoV-2 in rhesus  
703 macaques. *Nature* **586**, 583-588 (2020).
- 704 16. K. S. Corbett *et al.*, Evaluation of the mRNA-1273 Vaccine against SARS-CoV-2 in  
705 Nonhuman Primates. *N Engl J Med* **383**, 1544-1555 (2020).
- 706 17. A. Marzi, H. Feldmann, T. W. Geisbert, D. Falzarano, Vesicular Stomatitis Virus-Based  
707 Vaccines for Prophylaxis and Treatment of Filovirus Infections. *J Bioterror Biodef* **S1**,  
708 (2011).
- 709 18. C. E. Mire *et al.*, Use of Single-Injection Recombinant Vesicular Stomatitis Virus Vaccine  
710 to Protect Nonhuman Primates Against Lethal Nipah Virus Disease. *Emerg Infect Dis* **25**,  
711 1144-1152 (2019).
- 712 19. D. Safronetz *et al.*, A recombinant vesicular stomatitis virus-based Lassa fever vaccine  
713 protects guinea pigs and macaques against challenge with geographically and  
714 genetically distinct Lassa viruses. *PLoS Negl Trop Dis* **9**, e0003736 (2015).

- 715 20. A. Fathi, C. Dahlke, M. M. Addo, Recombinant vesicular stomatitis virus vector vaccines  
716 for WHO blueprint priority pathogens. *Hum Vaccin Immunother* **15**, 2269-2285 (2019).
- 717 21. A. Marzi *et al.*, EBOLA VACCINE. VSV-EBOV rapidly protects macaques against infection  
718 with the 2014/15 Ebola virus outbreak strain. *Science* **349**, 739-742 (2015).
- 719 22. W. Furuyama *et al.*, A single dose of a vesicular stomatitis virus-based influenza vaccine  
720 confers rapid protection against H5 viruses from different clades. *NPJ Vaccines* **5**, 4  
721 (2020).
- 722 23. K. S. Brown, D. Safronetz, A. Marzi, H. Ebihara, H. Feldmann, Vesicular stomatitis virus-  
723 based vaccine protects hamsters against lethal challenge with Andes virus. *J Virol* **85**,  
724 12781-12791 (2011).
- 725 24. A. M. Henao-Restrepo *et al.*, Efficacy and effectiveness of an rVSV-vectored vaccine in  
726 preventing Ebola virus disease: final results from the Guinea ring vaccination, open-  
727 label, cluster-randomised trial (Ebola Ca Suffit!). *Lancet* **389**, 505-518 (2017).
- 728 25. X. Qiu *et al.*, Mucosal immunization of cynomolgus macaques with the  
729 VSVDeltaG/ZEBOVGP vaccine stimulates strong ebola GP-specific immune responses.  
730 *PLoS One* **4**, e5547 (2009).
- 731 26. J. Emanuel *et al.*, A VSV-based Zika virus vaccine protects mice from lethal challenge. *Sci*  
732 *Rep* **8**, 11043 (2018).
- 733 27. V. J. Munster *et al.*, Respiratory disease in rhesus macaques inoculated with SARS-CoV-  
734 2. *Nature* **585**, 268-272 (2020).
- 735 28. A. Marzi *et al.*, Antibodies are necessary for rVSV/ZEBOV-GP-mediated protection  
736 against lethal Ebola virus challenge in nonhuman primates. *Proc Natl Acad Sci U S A* **110**,  
737 1893-1898 (2013).
- 738 29. A. R. Menicucci *et al.*, Transcriptome Analysis of Circulating Immune Cell Subsets  
739 Highlight the Role of Monocytes in Zaire Ebola Virus Makona Pathogenesis. *Front*  
740 *Immunol* **8**, 1372 (2017).
- 741 30. J. Wang *et al.*, Single mucosal, but not parenteral, immunization with recombinant  
742 adenoviral-based vaccine provides potent protection from pulmonary tuberculosis. *J*  
743 *Immunol* **173**, 6357-6365 (2004).
- 744 31. M. R. Neutra, P. A. Kozlowski, Mucosal vaccines: the promise and the challenge. *Nat Rev*  
745 *Immunol* **6**, 148-158 (2006).
- 746 32. L. H. A. Cavalcante-Silva *et al.*, Neutrophils and COVID-19: The road so far. *Int*  
747 *Immunopharmacol* **90**, 107233 (2020).
- 748 33. V. Francois-Newton *et al.*, USP18-based negative feedback control is induced by type I  
749 and type III interferons and specifically inactivates interferon alpha response. *PLoS One*  
750 **6**, e22200 (2011).
- 751 34. T. Matsumura *et al.*, TIFAB inhibits TIFA, TRAF-interacting protein with a forkhead-  
752 associated domain. *Biochem Biophys Res Commun* **317**, 230-234 (2004).
- 753 35. J. J. Wong, Y. F. Pung, N. S. Sze, K. C. Chin, HERC5 is an IFN-induced HECT-type E3 protein  
754 ligase that mediates type I IFN-induced ISGylation of protein targets. *Proc Natl Acad Sci*  
755 *U S A* **103**, 10735-10740 (2006).
- 756 36. Y. Peng *et al.*, Broad and strong memory CD4(+) and CD8(+) T cells induced by SARS-CoV-  
757 2 in UK convalescent individuals following COVID-19. *Nat Immunol* **21**, 1336-1345  
758 (2020).

- 759 37. O. Boyman, J. Sprent, The role of interleukin-2 during homeostasis and activation of the  
760 immune system. *Nat Rev Immunol* **12**, 180-190 (2012).
- 761 38. G. Abrahamsen, V. Sundvold-Gjerstad, M. Habtamu, B. Bogen, A. Spurkland, Polarity of  
762 CD4+ T cells towards the antigen presenting cell is regulated by the Lck adapter TSAd.  
763 *Sci Rep* **8**, 13319 (2018).
- 764 39. J. S. Woo *et al.*, CRACR2A-Mediated TCR Signaling Promotes Local Effector Th1 and Th17  
765 Responses. *J Immunol* **201**, 1174-1185 (2018).
- 766 40. Y. Xiong *et al.*, Transcriptomic characteristics of bronchoalveolar lavage fluid and  
767 peripheral blood mononuclear cells in COVID-19 patients. *Emerg Microbes Infect* **9**, 761-  
768 770 (2020).
- 769 41. J. B. Case *et al.*, Replication-Competent Vesicular Stomatitis Virus Vaccine Vector  
770 Protects against SARS-CoV-2-Mediated Pathogenesis in Mice. *Cell Host Microbe* **28**, 465-  
771 474 e464 (2020).
- 772 42. A. Marzi *et al.*, Single low-dose VSV-EBOV vaccination protects cynomolgus macaques  
773 from lethal Ebola challenge. *EBioMedicine* **49**, 223-231 (2019).
- 774 43. A. Huttner *et al.*, Determinants of antibody persistence across doses and continents  
775 after single-dose rVSV-ZEBOV vaccination for Ebola virus disease: an observational  
776 cohort study. *Lancet Infect Dis* **18**, 738-748 (2018).
- 777 44. J. Harcourt *et al.*, Severe Acute Respiratory Syndrome Coronavirus 2 from Patient with  
778 Coronavirus Disease, United States. *Emerg Infect Dis* **26**, 1266-1273 (2020).
- 779 45. Y. Tsuda *et al.*, Protective efficacy of a bivalent recombinant vesicular stomatitis virus  
780 vaccine in the Syrian hamster model of lethal Ebola virus infection. *J Infect Dis* **204 Suppl**  
781 **3**, S1090-1097 (2011).
- 782 46. H. B. TW, T. Girke, systemPipeR: NGS workflow and report generation environment.  
783 *BMC Bioinformatics* **17**, 388 (2016).
